1 **Fine-grained mapping of cortical somatotopies in chronic Complex Regional Pain**  
2 **Syndrome**

3 Flavia Mancini<sup>1,2,\*,#</sup>, Audrey P Wang<sup>3,4,\*</sup>, Mark M. Schira<sup>3,5</sup>, Zoey J. Isherwood<sup>5</sup>, James H.  
4 McAuley<sup>3,6</sup>, Giandomenico D Iannetti<sup>2</sup>, Martin I. Sereno<sup>7,8</sup>, G. Lorimer Moseley<sup>3,9</sup>,  
5 Caroline D. Rae<sup>3,6</sup>

6 <sup>1</sup>*Computational and Biological Learning, Department of Engineering, University of*  
7 *Cambridge, Cambridge, UK*

8 <sup>2</sup>*Department of Neuroscience, Physiology and Pharmacology, University College*  
9 *London, London, UK*

10 <sup>3</sup>*Neuroscience Research Australia (NeuRA), Sydney, Australia*

11 <sup>4</sup>*Faculty of Medicine and Health, University of Sydney, Australia*

12 <sup>5</sup>*School of Psychology, University of Wollongong, Wollongong, Australia*

13 <sup>6</sup>*School of Medical Sciences, University of New South Wales, Sydney, Australia*

14 <sup>7</sup>*Department of Psychology, University College London, London, UK*

15 <sup>8</sup>*Department of Psychology, San Diego State University, San Diego, USA*

16 <sup>9</sup>*School of Health Sciences, University of South Australia, Adelaide, Australia*

17

18 *\* Shared contribution*

19

20

21 *# Corresponding author:*

22 Flavia Mancini

23 University of Cambridge

24 Department of Engineering

25 Computational and Biological Learning

26 Trumpington Street, Cambridge, CB2 1PZ

27 [flavia.mancini@eng.cam.ac.uk](mailto:flavia.mancini@eng.cam.ac.uk)

28

29

30

31

32 **Abstract**

33 It has long been thought that severe chronic pain conditions, such as Complex Regional  
34 Pain Syndrome (CRPS), are not only associated with, but even maintained by a  
35 reorganisation of the somatotopic representation of the affected limb in primary  
36 somatosensory cortex (S1). This notion has driven treatments that aim to restore S1  
37 representations, such as sensory discrimination training and mirror therapy. However,  
38 this notion is based on both indirect and incomplete evidence obtained with imaging  
39 methods with low spatial resolution. Here, we used functional MRI to characterize the S1  
40 representation of the affected and unaffected hand in patients with unilateral CRPS. At  
41 the group level, the cortical area, location, and geometry of the S1 representation of the  
42 CRPS hand were largely comparable to those of the healthy hand and controls.  
43 However, the area of the map of the affected hand was modulated by disease duration  
44 (the smaller the map, the more chronic the CRPS), but not by pain intensity, pain  
45 sensitivity and severity of the physical disability. Thus, if any map reorganization occurs,  
46 it does not appear to be directly related to our pain measures. These findings compel us  
47 to reconsider the cortical mechanisms underlying CRPS and the rationale for  
48 interventions that aim to “restore” somatotopic representations to treat pain.

49

50 **Significance statement**

51

52 This study shows that the spatial map of the fingers in S1 is largely preserved in chronic  
53 CRPS. Shrinkage of the area of the affected hand map can occur in the most chronic  
54 stages of disease. Map shrinkage is related to CRPS duration rather than diagnosis, and  
55 is unrelated to how much pain patients experience or to the severity of the physical  
56 disability. These findings challenge the rationale for using sensory interventions to treat  
57 pain by restoring somatotopic representations in CRPS patients.

58

59

## 60 Introduction

61 Chronic pain is a highly common and debilitating disorder, that can be associated with  
62 functional and morphological changes in the brain. For instance, it has long been  
63 thought that some severe chronic pain conditions, such as Complex Regional Pain  
64 Syndrome (CRPS), are not only associated with, but even maintained by, maladaptive  
65 topographic changes in the primary somatosensory cortex (S1) (Maihofner et al., 2003,  
66 2004). Magneto- and electro-encephalography (MEG, EEG) studies have suggested that  
67 the representation of the CRPS hand in S1 is abnormally smaller than the cortical  
68 representation of the healthy hand (Juottonen et al., 2002; Maihofner et al., 2003; Pleger  
69 et al., 2004; Vartiainen et al., 2008; Vartiainen et al., 2009). The notion of S1  
70 reorganisation has been central to our understanding of the condition (Marinus et al.,  
71 2011) and has driven physiotherapy interventions aimed at restoring sensorimotor  
72 representations of CRPS limbs, such as mirror-visual feedback (McCabe et al., 2003;  
73 Smart et al., 2016) and sensory discrimination training (Pleger et al., 2005; Moseley et  
74 al., 2008a). Here, we revisit the notion of S1 reorganisation with the better tools that  
75 modern functional MRI currently offers: high spatial resolution and phase encoded  
76 methods that provide reliable and unbiased measures of the cortical somatotopy of the  
77 hand (Mancini et al., 2012; Sanchez-Panchuelo et al., 2012; Kolasinski et al., 2016a).

78 In all previous studies on CRPS, the size of the hand map was estimated both *indirectly*  
79 *and incompletely*: it was estimated by measuring the Euclidean distance between  
80 activation loci of the thumb or index finger relative to that of the little finger. The  
81 somatotopy of the full hand has never been characterized in CRPS patients. A more  
82 reliable fMRI method for studying cortical topographic representations is based on  
83 phase-encoded mapping, which reveals the spatial preference of cortical neural  
84 populations (Serenó et al., 1995; Silver and Kastner, 2009; Sereno and Huang, 2014).  
85 This method involves delivering a periodic sensory stimulus to different portions of the  
86 receptive surface and evaluating which voxels selectively respond to the spatial  
87 frequency of the stimulation. Voxels sensitive to the stimulus respond when the stimulus  
88 passes through the preferred spatial location and decay as the stimulus moves away  
89 (Chen et al., 2017). The response phase angle, extracted using a Fourier transform  
90 (Mancini et al., 2012), indicates the location preference for each voxel—in other words,  
91 the position of the receptive fields of the population of neurons sampled by the voxel.

92  
93 Using phase-encoded mapping, we provide the first complete characterisation and  
94 quantification of the representation of the fingers (i.e. with exclusion of the thumb) in  
95 patients with chronic and unilateral CRPS to the upper limb. We tested whether the S1  
96 representation of the fingertips of the affected hand was different from that of the healthy  
97 hand of CRPS patients and from controls in terms of its spatial extent, location relative to  
98 the central sulcus, and geometry (i.e. variability of the map gradients).

## 100 Materials and Methods

101

102 **Participants.** We recruited 20 adults with unilateral CRPS to the upper limb and 20  
103 healthy controls (HC) matched for age, gender and handedness. Each participant gave  
104 written informed consent to take part in the study. All experimental procedures were  
105 carried out in accordance with the Declaration of Helsinki and approved by both the  
106 Human Research Ethics Committee of the University of New South Wales (HC13214)  
107 and by the Human Ethics Committee of the South Eastern Local Health District (HREC  
108 10/051). Inclusion criteria for control participants were: (1) pain-free at that time of the  
109 study; (2) no prior history of a significant chronic pain, psychiatric or medical disorder; (3)  
110 no history of substance abuse. Inclusion criteria for CRPS patients were: (1) a diagnosis  
111 of unilateral CRPS to the upper limb or hand according to the Budapest research criteria  
112 (Harden et al., 2010); (2) CRPS duration greater than 3 months; (3) no history of  
113 substance abuse and no psychiatric-comorbidities. Five of 40 participants were excluded  
114 from the study due to the following problems: MRI scanner failure (subject #31) or  
115 acquisition problems (#13, #15, #32) and a control participant reported pain to the wrist  
116 on the day of scan (a median nerve compression was subsequently diagnosed, #42).  
117 The demographic and clinical information of the remaining sample (Controls: n = 17;  
118 CRPS to the left hand: n = 8; CRPS to the right hand: n = 10) is reported in Table 1.

119  
120 **Clinical evaluation.** Patients were clinically evaluated according to the Budapest  
121 research criteria (Harden et al., 2010) by a blinded assessor of the research team on the  
122 first session of the study to confirm that the research criteria were met. As part of the  
123 clinical and diagnostic assessment of CRPS, we assessed pressure pain thresholds  
124 (PPT; kg/cm<sup>2</sup>) using a digital pressure algometer (Wagner instrument, Greenwich, USA)  
125 on two sites of each hand: the thenar eminence and the third proximal interphalangeal  
126 joint. Pain intensity was also rated using an 11-points Likert scale, where 0  
127 corresponded to “no pain” and 10 indicated “the worst pain imaginable, like a red hot  
128 poker through your eye”. The intensity of spontaneous pain in the upper limb was rated  
129 in all patients immediately before, during and after the imaging session. Two control  
130 participants reported discomfort and mild to moderate postural pain to the upper limb  
131 during the scanning session (Table 1). Furthermore, the *QuickDash* (Disabilities of the  
132 Arm, Shoulder and Hand) questionnaire was administered to all participants; the  
133 *QuickDash* measures physical function and symptoms in people with musculoskeletal  
134 disorders of the upper limb (Kennedy et al., 2011).

135  
136 **Stimuli.** We used a customised stimulus (polypropylene probe with a rounded tip)  
137 because CRPS skin physiology and symptoms (hand dystonia, pain) preclude the use of  
138 conventional and automated mechanical stimulation for the prolonged time required  
139 for phase-encoded mapping of the fingertips (approx. 40 minutes). For example, hand  
140 dystonia makes it difficult to target the same skin regions with air-puffs throughout the  
141 imaging session; this would have resulted in scan quality deterioration or early scan  
142 termination. CRPS-related hyperhidrosis (i.e. excessive sweating) precludes the use of  
143 electrical and vibrotactile stimulation for a long time.

144



145 All control participants reported the stimulus as being clearly detectable, neither painful  
146 nor unpleasant, and similarly intense on the different fingers of the two hands. All  
147 patients described the sensation that was elicited by stimulation of the unaffected  
148 fingers, in similar terms to those used by the control participants. Patients described the  
149 sensation that was elicited by stimulation of the affected fingers in a variety of ways;  
150 “burning”, “tingling”, “pain”, “brushing like with a sharp object”, “horrible”, “itchy”,  
151 “scraping”, “like a needle prick”, “electric shooting pain”. These terms are consistent with  
152 the clinical phenomenon of allodynia.

153

154 Participants did not report systematic differences in stimulus perception across the  
155 fingertips of the same hand. Pain intensity fluctuates over time in most chronic pain  
156 conditions (including CRPS), even despite highly-controlled and reproducible stimulation  
157 (Foss et al., 2006). However, such fluctuations are unlikely to confound our measures of  
158 cortical somatotopy. Indeed, our analysis method allowed to dissect the magnitude of  
159 the brain responses from their spatial organization. All our analyses did not focus on the  
160 magnitude of the S1 responses, but on their spatial organisation, which is not  
161 confounded by unavoidable fluctuations of perceived stimulus intensity in CRPS  
162 patients.

163

164 **Procedure.** Each participant laid supine inside the scanner bore with both hands palm  
165 upwards. Participant’s arms and hands were propped with cushions and pads to  
166 minimise movements. The stimulus consisted of periodic stimulation of the fingertips of  
167 both hands. In each stimulation cycle, the tips of the index, middle, ring, and little fingers  
168 were successively stimulated using a customised probe (see below). Each fingertip was  
169 stimulated for 6 s, and each cycle (four fingers x 6 s = 24 s) was interleaved by 6 s of  
170 rest. Twelve cycles were administered in each of the four consecutive functional runs  
171 (approx. 10 minutes each). Two trained experimenters stimulated the tips of homologous  
172 fingers of the right and left hands simultaneously. The experimenters received auditory  
173 cues through headphones, synchronising the location and timing of each stimulus. The  
174 thumb was not stimulated to reduce scanning time and due to practical difficulties in  
175 stimulating the thumb in succession to the other fingertips (patients could not keep the  
176 hand open flat for prolonged periods of time).

177

178 Our choice of bilateral stimulation was motivated by the need to map the fingertips of  
179 both hands in a single imaging session (several patients travelled from distant regions in  
180 Australia). Importantly, our choice was grounded on neuroscientific evidence that there  
181 are extremely limited trans-callosal connections between the hand representations of S1  
182 in the primate brain (Jones and Hendry, 1980; Killackey et al., 1983). We note that some  
183 studies have reported an inhibitory response to hand stimulation in ipsilateral S1  
184 (Hlushchuk and Hari, 2006; Lipton et al., 2006; Klingner et al., 2011). The deactivation of  
185 ipsilateral S1 is most likely mediated by an input that ascends the contralateral pathway  
186 to a higher-order cortical area, crosses in the corpus callosum, and is then fed back to  
187 area 3b in S1 (Lipton et al., 2006; Tommerdahl et al., 2006). Ipsilateral finger  
188 representations are engaged in active movement, but not during somatosensory

189 processing (Berlot et al., 2018). Peripheral nerve injury can enhance activity in ipsilateral  
190 S1 (Fornander et al., 2016), especially at the level of interneurons in laminae V and VI  
191 (Pelled et al., 2009). Crucially, ipsilateral activations and deactivations in S1 are diffused  
192 and not somatotopically specific (Helmich et al., 2005; Reed et al., 2011; Ann Stringer et  
193 al., 2014; Geva et al., 2017). They can modulate the amplitude of the S1 response  
194 (which is not of interest here), but there is no evidence that they affect the spatial  
195 (somatotopic) organisation of the contralateral responses (Reed et al., 2011; Ann  
196 Stringer et al., 2014; Geva et al., 2017). This is further confirmed by our preliminary  
197 imaging data, in which we found that unilateral vs. bilateral fingertip mapping yielded  
198 both greatly similar and highly reproducible fingertip maps in S1 (Figure 1). Therefore,  
199 we considered bilateral finger stimulation as a resource-efficient method to map the S1  
200 somatotopy of the fingers of both hands in a single imaging session, thus boosting  
201 recruitment and compliance of CRPS patients.

202

203 **MRI acquisition.** Echoplanar images (1.5 mm<sup>3</sup> isotropic resolution, 183 volumes/run, 32  
204 axial slices, flip angle = 82°, TR = 2s) were collected in four runs on a Philips Achieva TX  
205 3T MRI scanner using a 32-channel head coil. FreeSurfer  
206 (<https://surfer.nmr.mgh.harvard.edu/>) was used to reconstruct the cortical surface for each  
207 subject from a structural T1 image (0.727×0.727 mm<sup>2</sup> in-plane, 0.75 mm thick slices, 250  
208 slices, flip angle = 8°, TR = 6.318 ms). In four subjects (28, 29, 33, 34), structural T1  
209 images were corrected for non-uniform intensity using the AFNI's tool '3dUnifize'  
210 (<https://afni.nimh.nih.gov/>), before surface reconstruction, because these images  
211 contained shading artefacts that could have affected segmentation.

212

213 **First-level MRI analyses.** All first-level analyses were performed by a researcher (FM)  
214 blinded to the group condition (right CRPS, left CRPS, control). The first 3 volumes from  
215 EPs were discarded from all analyses. Functional series were aligned and motion-  
216 corrected using the AFNI program '3dvolreg'. Using this as a starting point, functional-to-  
217 high resolution alignment was then refined using manual blink comparison using an  
218 adaptation of Freesurfer's TkRegister implemented in csurf  
219 (<http://www.cogsci.ucsd.edu/~sereno/tmp/dist/csurf/>). After linear trend removal, aligned  
220 data from the four runs were raw-averaged, and then analysed using a fast Fourier  
221 transform, computed for the time series at each voxel fraction (vertex): this resulted in  
222 complex-valued signals with the phase angle and magnitude of the BOLD response at  
223 each voxel. The phase angle is the measure of interest here, because it reflects the  
224 spatial preference of a given voxel. Both Fourier and statistical analysis were performed  
225 using csurf. No spatial smoothing was performed before statistical analyses. Very low  
226 temporal frequencies and harmonics (< 0.005 Hz) were excluded because movement  
227 artefacts dominate responses at these frequencies, a procedure virtually identical to  
228 regressing out signals correlated with low frequency movements. High frequencies up to  
229 the Nyquist limit were allowed (i.e. half the sampling rate); this corresponds to no use of  
230 low pass filter. For display, a vector was generated whose amplitude is the square root  
231 of the F-ratio calculated by comparing the signal amplitude at the stimulus frequency to  
232 the signal at other noise frequencies and whose angle was the stimulus phase. To

233 minimize the effect of superficial veins on BOLD signal change, superficial points along  
234 the surface normal to each vertex were disregarded (top 20% of the cortical thickness).

235

236 The F-ratio was subsequently corrected at  $p < 0.01$  using a surface-based cluster  
237 correction for multiple comparisons as implemented by `surfclust` and `randsurfclust` within  
238 the `csurf` FreeSurfer framework (Hagler et al., 2006). The Fourier-transformed data were  
239 then sampled onto the individual cortical surface. Using this statistical threshold, we cut  
240 a label containing all vertices that showed a significant periodic response to finger  
241 stimulation (see one example in Figure 7A) and was localised within S1 (i.e. within the  
242 boundaries of areas 3a, 3b and 1, as estimated by the cortical parcellation tools  
243 implemented in FreeSurfer). This label, or region of interest (ROI), is used as the input  
244 for the analyses described in the next sections. The phase-encoded stimulation  
245 procedure that we used is designed to map the hand region across fingers, not within  
246 fingers (Sanchez-Panchuelo et al., 2012). Therefore, we could not derive accurate ROIs  
247 for each finger in isolation. This is because voxels that are activated by more than one  
248 finger are masked out. Furthermore, we did not derive ROIs for the different subdivisions  
249 of S1 because a precise and reliable parcellation of the cortical surface at single-subject  
250 level would require microstructural imaging.

251

252 In a few cases, we could not identify any ROI with a response to fingertip stimulation (no  
253 response to either fingertip stimulation), even at uncorrected  $p < 0.05$ : subject #3, right  
254 hemisphere (patient with right CRPS); subject #20, left hemisphere (right CRPS); subject  
255 #24, left hemisphere (right CRPS); subject #28, left hemisphere (left CRPS); subject  
256 #29, right hemisphere (left CRPS). These cases were excluded from further analysis.

257

258 ***Evaluation of hand map area.*** We calculated the surface area of the left- and right-  
259 hand maps, from each participant ROI. This was done after resampling the phase maps  
260 onto the original average brain volume, to control for inter-individual variability in brain  
261 size. In order to increase statistical power, we pooled data from the two CRPS groups  
262 and compared map area in the affected vs unaffected sides with both a frequentist and a  
263 Bayesian mixed-effects ANOVAs with a within-subject factor 'side' (2-levels: affected,  
264 unaffected) and a between-subjects factor 'group' (2-levels: controls, CRPS). In the  
265 CRPS group, we tested whether the area of the maps of the affected and unaffected  
266 hands could be explained using Bayesian linear regression models by the following  
267 variables: (1) CRPS duration; (2) the severity of upper limb disability as measured by the  
268 *QuickDash* score; (3) pain intensity rating collected during the imaging session; (4) a  
269 severity score derived from the difference of PPT thresholds in the two hands as follows:

270

$$PP_{\text{severity}} = [ (PPT_{\text{unaffected hand}} - PPT_{\text{affected hand}}) / PPT_{\text{unaffected hand}} ] 100 \quad (1)$$

271

272

273 ***Evaluation of hand map location.*** We controlled for individual differences in brain  
274 morphology as follows. We first inflated each participant's cortical surface to a sphere  
275 and then non-linearly morphed it into alignment with an average spherical cortical  
276 surface using FreeSurfer's tool `mri_surf2surf` (Fischl et al., 1999). This procedure

277 maximizes alignment between sulci (including the central sulcus), while minimizing  
278 metric distortions across the surface. We resampled phase maps onto this average  
279 spherical surface (Freesurfer's fsaverage) and calculated the location of the centroid of  
280 the map on this average surface. We investigated whether the map centroid was  
281 different across sides and groups, in two ways.

282

283 First, we tested whether the distribution of spherical coordinates was different across  
284 conditions ('side' and 'group'). As a basis for this comparison, we used the Fisher  
285 probability density function (Fisher, 1953), which is the spherical coordinate system  
286 analogue of the Gaussian probability density function. This approach has been  
287 commonly used in the field of paleomagnetism and has also been applied for the  
288 analysis of direction data from diffusion tensor imaging (Hutchinson et al., 2012). We  
289 calculated the F statistics for the null hypothesis that sample observations from two  
290 groups are taken from the same population. The following equation was derived from  
291 Watson (Watson, 1956; Hutchinson et al., 2012) and used to compare two groups with  
292  $N_1$  and  $N_2$  observed unit vectors and resultant vectors of length  $R_1$  and  $R_2$  respectively:

293

$$F_{2,2(N-2)} = (N - 2) \frac{(R_1 + R_2 - R)}{(N - R_1 - R_2)} \quad (2)$$

294

295 where  $N = N_1 + N_2$  and  $R$  is the length of the resultant vector for the pooled direction  
296 vector observations from both groups. The resultant vector sums of all observations,  $R_1$ ,  
297  $R_2$ , and  $R$ , are calculated as follows:

298

$$R = \sqrt{\left(\sum_{i=1}^N x_i\right)^2 + \left(\sum_{i=1}^N y_i\right)^2 + \left(\sum_{i=1}^N z_i\right)^2} \quad (3)$$

299

300 where  $x_i$ ,  $y_i$ ,  $z_i$  are the coordinates of the map centroids for each participant.

301

302 We performed the following F contrasts, separately for each hemisphere: controls vs  
303 patients with right CRPS and controls vs patients with left CRPS (four F tests in total).  
304 The larger the value of F, the more different the two group mean directions. A p-value  
305 was obtained using the appropriate degrees of freedom (2 and 2(N-2), respectively) and  
306 critical probability level of 0.05. The F statistics for  $H_0$  (no difference) and  $H_1$  was used to  
307 calculate the BF for each contrast, as follows (Held and Ott, 2018, equation 5):

308

$$BF_{(F)} = \frac{f_F(F(p)|H_0)}{f_F(F(p)|H_1)} \quad (4)$$

309

310 The F-based  $BF_{10}$  is simply equal to  $1/BF_{(F)}$ .

311

312 As a complementary measure of map location, we computed the geodesic distance, in  
313 mm, between the map centroid and an arbitrary reference point located within the

314 concavity of the central sulcus (displayed in Figure 6C). Geodesic distances were  
315 statistically compared using both a frequentist and a Bayesian mixed-effects ANOVA  
316 with a within-subject factor 'side' (2-levels: affected, unaffected) and a between-subjects  
317 factor 'group' (2-levels: controls, CRPS).

318

319 Note that we did not estimate the centroid of each finger representation because our  
320 mapping method is not designed to reveal independent representations of individual  
321 fingers, given that each finger is stimulated in succession. Future studies are required to  
322 investigate finger-specific representations in CRPS.

323

324 ***Evaluation of hand map geometry.*** As a measure of the functional geometry of the  
325 map, we measured the spatial arrangement (i.e. direction) of the spatial gradients of the  
326 map. As illustrated in Figure 7A, the hand map exhibits a typical spatial gradient from  
327 index finger to little finger. For each participant, we resampled the map ROIs from the  
328 inflated cortical surface of each participant onto a flattened, two-dimensional, surface  
329 patch. After sampling the complex-valued 3D phase-mapping data to the folded surface,  
330 we displayed it on a small flattened, 2D surface patch, which minimizes deviations from  
331 original geometry. We gently smoothed the complex values on the surface using a 1.5  
332 mm kernel and then converted the complex-valued data (real, imaginary) to amplitude  
333 and phase angle. The 2D gradient of the phase angle was computed after fitting a plane  
334 to the data from the surrounding vertices (taking care to circularly subtract the angular  
335 data). The amplitude of the gradient at each vertex was then normalized for display.

336

337 The mean direction of map gradients is not informative because each participant cortical  
338 patch has an arbitrary direction. However, the spread (or variability) of map gradients is  
339 informative, because it doesn't depend on the orientation of the cortical surface patch;  
340 higher variability of gradient directions indicates that the map phases are more spread  
341 and less spatially organized. Therefore, we investigated whether the functional geometry  
342 of the map is affected by CRPS, by testing whether the gradient directions of the map of  
343 the affected hand were more variable than those of the unaffected hand and controls. As  
344 a measure of map gradient variability, we calculated the circular variance of the gradient  
345 angles of each ROI. We conducted a Harrison-Kanji test (Harrison and Kanji, 1988;  
346 Berens, 2009) on the gradient variances to statistically compare the variability of map  
347 gradients across groups and participants. This test allowed us to perform a two-factor  
348 ANOVA for circular data, with a within-subject factor 'side' (2-levels: affected, unaffected)  
349 and a between-subjects factor 'group' (2-levels: controls, CRPS). BFs for each contrast  
350 were calculated as described by equation 4 (the probability level for  $H_0$  was 0.05).

351

352 We tested the hypothesis that there was a relation between map gradient variability and  
353 disease duration, using the equation for circular-linear correlation ( $r_{cl}$ ) described in (Zar,  
354 1999: equation 27.47). A p-value for  $r_{cl}$  is computed by considering the test statistic  $N r_{cl}^2$ ,  
355 which follows a  $\chi^2$  distribution with two degrees of freedom (Berens, 2009). BFs based  
356 on the  $\chi^2$  distribution were calculated following equation 4 (with 0.05 probability level for  
357  $H_0$ ).



358

359 **Cross-subject average (for illustration).** We averaged maps across subjects purely for  
360 illustration. All statistical analyses were performed on measures derived from the  
361 individual-subjects maps. We first inflated each participant's cortical surface to a sphere,  
362 and then non-linearly morphed it into alignment with an average spherical cortical  
363 surface using FreeSurfer's tool `mri_surf2surf` (Fischl et al., 1999). This procedure  
364 maximizes alignment between sulci (including the central sulcus), while minimizing  
365 metric distortions across the surface. Four steps of nearest-neighbour smoothing ( $<1.5$   
366 mm FWHM in 2D) were applied to the data after resampling on the spherical surface.  
367 Complex-valued mapping signals were then combined across all subjects  
368 (independently of whether the S1 map was detected or not) on a vertex-by-vertex basis  
369 by vector averaging (Mancini et al., 2012). The amplitude was normalized to 1, which  
370 prevented overrepresenting subjects with strong amplitudes. Finally, a scalar cross-  
371 subject F-ratio was calculated from the complex data and rendered back onto  
372 'fsaverage' (uncorrected,  $p < 0.05$ ).

373

#### 374 **Software and Data Availability**

375 Software to perform phase-mapping analyses is openly available at  
376 <http://www.cogsci.ucsd.edu/~sereno/tmp/dist/csurf>. We used an open-source software  
377 (JASP) for the Bayesian statistical analyses: <https://jasp-stats.org>. Each individual hand map  
378 ROI is available at <OSF link to be disclosed upon acceptance>.

379

## 380 **Results**

381

### 382 **Demographics and sensitivity to pain**

383

384 Table 1 reports the demographic and clinical information of the study sample (Healthy  
385 controls:  $n = 17$ ; CRPS to the left hand:  $n = 8$ ; CRPS to the right hand:  $n = 10$ ). Age was  
386 similar in the control group (mean  $\pm$  SD,  $44.9 \pm 12.0$  years) and in the patients ( $44.2 \pm$   
387  $11.3$ ; independent samples t-test:  $t_{33} = 0.19$ ,  $p = 0.856$ ,  $BF_{10} = 0.329$ ). Handedness was  
388 evaluated using the Edinburgh Handedness Inventory, which yields a laterality score that  
389 ranges from  $-100$  (left-hand dominant) to  $+100$  (right-hand dominant) (Oldfield, 1971).  
390 This laterality score was comparable in controls ( $73.6 \pm 49.8$ ) and patients ( $61.6 \pm 58.1$ ;  
391 independent samples t-test:  $t_{33} = 0.65$ ,  $p = 0.518$ ,  $BF_{10} = 0.384$ ). Age of patients was  
392 similar to those found in the UK CRPS Registry (Shenker et al., 2015): mean age at  
393 onset was  $43 \pm 12.7$  years ( $n = 239$ ), whereas mean pain duration was  $2.9$  years ( $n =$   
394  $237$ ) was slightly shorter in the UK CRPS registry.

395

396 As expected, CRPS patients were more sensitive to pressure, with lower average pain  
397 pressure threshold (PPT) on their affected hand ( $3.4 \pm 3.8$ ) than on their unaffected hand  
398 ( $7.6 \pm 11.0$ ; paired samples t-test:  $t_{17} = -2.21$ ,  $p = 0.041$ ,  $BF_{10} = 1.679$ ). Confirming that  
399 the CRPS was unilateral, PPTs on the unaffected hand of CRPS patients were similar to  
400 those of controls (average left and right hand of controls  $\pm$  SD,  $10.7 \pm 14.9$ ; independent  
401 samples t-test:  $t_{33} = 0.72$ ,  $p = 0.476$ ,  $BF_{10} = 0.398$ ). Ratings of spontaneous pain did not

402 vary in a consistent fashion before and after the imaging session (mean difference  $\pm$  SD,  
403  $0.6 \pm 2.5$ ;  $t_{16} = 0.96$ ,  $p = 0.351$ ,  $BF_{10} = 0.281$ ).

404

## 405 **Somatotopic representation of the hand in S1**

406

407 We stimulated the tips of each finger in succession, as shown in Figure 2A, using a  
408 mechanical probe. Mechanical stimulation to the fingertips elicited a periodic response in  
409 the hand region of S1 (Figure 2B). A selection of single-subjects maps is shown in  
410 Figure 3 and the average maps are displayed in Figure 4. The map phase angle  
411 (indicating finger preference) is displayed using a continuous colour scale (red to green  
412 to blue to yellow), the saturation of which is masked by the statistical threshold. All  
413 analyses were performed on individual subject data (cluster-corrected at  $p < 0.01$ ), but  
414 uncorrected group maps ( $p < 0.05$ ) are displayed in Figure 4 merely for illustration.  
415 Phases corresponding to rest (no stimulation) have been truncated. The map showed a  
416 clear spatial gradient of digit preference, progressing from d2 (index finger) to d3, d4 and  
417 d5 (little finger). The arrangement and location of the map was qualitatively similar to  
418 that reported in previous human fMRI studies (Sanchez-Panchuelo et al., 2010; Mancini  
419 et al., 2012; Besle et al., 2013; Martuzzi et al., 2014; Kolasinski et al., 2016a).

420

421 We tested whether the area, location, and functional geometry of the map of the affected  
422 hand was similar to those of the unaffected hand and controls. To do so, we defined  
423 individual ROIs as clusters located in S1 that showed a significant periodic response at  
424 the spatial frequency of stimulation (cluster-corrected,  $p < 0.01$ ).

425

### 426 **1. Map area**

427 To control for inter-individual variability in brain size, we resampled the phase maps onto  
428 the original average brain volume. We then calculated the surface area of the left- and  
429 right-hand maps from each participant ROI. In order to increase statistical power, we  
430 flipped the data from the right hand CRPS group so that the affected side became the  
431 left hand/right hemisphere in all patients and then pooled these data. As evident in  
432 Figure 5A, the map area was comparable among groups and sides. A mixed-effects  
433 ANOVA with a within-subject factor 'side' (2-levels: affected, unaffected) and a between-  
434 subjects factor 'group' (2-levels: controls, CRPS) did not provide evidence for any main  
435 effect or interaction ('side':  $F_{1,28} = 0.281$ ,  $p = 0.60$ ,  $p\eta^2 = 0.010$ ; 'group':  $F_{1,28} = 1.555$ ,  $p =$   
436  $0.223$ ,  $p\eta^2 = 0.053$ ; 'side' by 'group':  $F_{1,28} = 0.315$ ,  $p = 0.579$ ,  $p\eta^2 = 0.011$ ). A Bayesian  
437 mixed-effects ANOVA provided the stronger evidence for the null model ( $BF_{10} = 1$ ,  
438  $P(\text{Mldata}) = 0.492$ ) relative to models of 'group' ( $BF_{10} = 0.512$ ,  $P(\text{Mldata}) = 0.252$ ), 'side'  
439 ( $BF_{10} = 0.305$ ,  $P(\text{Mldata}) = 0.150$ ), 'side+group' ( $BF_{10} = 0.153$ ,  $P(\text{Mldata}) = 0.075$ ),  
440 'side+group+interaction' ( $BF_{10} = 0.126$ ,  $P(\text{Mldata}) = 0.030$ ).

441

#### 442 **1.1. Relation with disease duration**

443 We checked whether there was any relationship between map size and duration of  
444 disease. As the distribution of disease duration values was skewed towards small  
445 values, disease duration data were first transformed onto natural logarithms. The log-



446 transformed disease duration was normally distributed (Shapiro-Wilk test = 0.94,  $p =$   
447 0.293; skewness =  $-0.002 \pm 0.536$ ). A Bayesian linear regression showed stronger  
448 evidence for a model in which the area of the map covaried with (log-transformed)  
449 disease duration  $BF_{10} = 3.016$ ,  $P(\text{Mldata}) = 0.030$ ) than for the null model ( $BF_{10} = 1$ ,  
450  $P(\text{Mldata}) = 0.249$ ): in participants that suffered from CRPS for a longer time had a  
451 smaller map of the affected hand.

452

### 453 **1.2. Relation with upper limb disability**

454 Disease duration did not correlate with the severity of disability of the CRPS limb, as  
455 measured by the *QuickDash* score (Pearson's  $r = 0.002$ ,  $BF_{10} = 0.291$ ). In patients, the  
456 *QuickDash* score did not predict the area of the map of the affected hand in a Bayesian  
457 linear regression analysis (null model:  $BF_{10} = 1$ ,  $P(\text{Mldata}) = 0.620$ ; disability model:  $BF_{10}$   
458 = 0.614,  $P(\text{Mldata}) = 0.380$ ).

459

### 460 **1.3. Relation with pain intensity**

461 We found no evidence for a linear relation between the area of the map of the affected  
462 hand and pain intensity ratings obtained during the imaging session (ratings for each  
463 subject are reported in Table 1). The null model ( $BF_{10} = 1$ ,  $P(\text{Mldata}) = 0.685$ ) won over  
464 a model in which the area of the map of the affected hand linearly covaried with pain  
465 intensity ratings ( $BF_{10} = 0.460$ ,  $P(\text{Mldata}) = 0.315$ ). Moreover, there was no evidence for  
466 a relation between the area of the map of the affected hand and a score of pain severity  
467 derived from PPTs ( $PP_{\text{severity}}$ ). A Bayesian linear regression showed that the null model  
468 ( $BF_{10} = 1$ ,  $P(\text{Mldata}) = 0.510$ ) and a model with  $PP_{\text{severity}}$  ( $BF_{10} = 0.960$ ,  $P(\text{Mldata}) =$   
469 0.490) were similarly likely. In our sample, disease duration did not correlate with either  
470 pain intensity ratings collected during the imaging session (Pearson's  $r = 0.249$ ,  $BF_{10} =$   
471 0.463) or with  $PP_{\text{severity}}$  (Pearson's  $r = -0.108$ ,  $BF_{10} = 0.317$ )

472

473 Finally, the area of the map of the unaffected hand was not explained by CRPS duration,  
474 pain intensity rating, or  $PP_{\text{severity}}$  (all  $BF_{10}$  for null models = 1; all  $BF_{10}$  for alternative  
475 models  $< 0.6$ ).

476

477 In summary, these analyses do not provide support for the hypothesis that the map of  
478 the CRPS hand was smaller than the map of the unaffected hand and that of healthy  
479 controls, at group level. However, we found evidence that the map area of the CRPS  
480 hand was modulated by disease duration, across participants. The more chronic was the  
481 disease, the smaller was the map of the affected hand. Map area was not predicted by  
482 various measures of pain severity and upper limb disability.

483

## 484 **2. Map location**

485 We calculated the centroid of the hand map, after resampling it onto an average  
486 spherical surface (see "Evaluation of hand map location" for details). This was done to  
487 control for individual differences in brain morphology and to obtain localisation measures  
488 that were not confounded by gyrification. Figure 6A-B shows the distribution of map  
489 centroids of each participant, resampled onto a canonical spherical cortical surface of an

490 average brain; the map centroid location was variable among participants of each group,  
491 but visibly similar across groups. Indeed, the F-statistics based on the Fisher probability  
492 density function (Fisher, 1953) did not provide evidence for any directional difference  
493 between groups for either side (Table 2).

494

495 As a further comparison of the locations of map centroids across groups, we computed  
496 the geodesic distance, in mm, between the map centroid and an arbitrary reference point  
497 located within the concavity of the central sulcus (Figure 6C). Importantly, geodesic  
498 distance measures calculated onto average spherical surfaces are not confounded by  
499 gyrification and allow comparison of different subjects. This is a key advantage of our  
500 approach over previous studies which measured Euclidean distances between two  
501 finger representations. A mixed-effects ANOVA with a within-subject factor 'side' and a  
502 between-subjects factor 'group' did not provide evidence for any main effect or  
503 interaction ('side':  $F_{1,28} < 0.01$ ,  $p = 0.999$ ,  $p\eta^2 < 0.001$ ; 'group':  $F_{1,28} = 0.163$ ,  $p = 0.689$ ,  
504  $p\eta^2 = 0.006$ ; 'side' by 'group':  $F_{1,28} = 0.254$ ,  $p = 0.619$ ,  $p\eta^2 = 0.009$ ). In a Bayesian mixed-  
505 effects ANOVA, the null model had stronger evidence ( $BF_{10} = 1$ ,  $P(\text{Mldata}) = 0.581$ )  
506 relative to models of 'group' ( $BF_{10} = 0.340$ ,  $P(\text{Mldata}) = 0.198$ ), 'side' ( $BF_{10} = 0.262$ ,  
507  $P(\text{Mldata}) = 0.152$ ), 'side+group' ( $BF_{10} = 0.087$ ,  $P(\text{Mldata}) = 0.051$ ),  
508 'side+group+interaction' ( $BF_{10} = 0.032$ ,  $P(\text{Mldata}) = 0.019$ ).

509

510 Altogether, these analyses indicate that the location of the hand map centroid was not  
511 affected by CRPS.

512

### 513 **3. Map geometry**

514 Finally, we evaluated the variability of the geometry of the map of the affected hand in  
515 CRPS patients. As illustrated in Figure 7A, the hand map exhibits a typical spatial  
516 gradient from index finger to little finger. The spatial gradient (i.e. the direction) of the  
517 map indicates the spatial progression of the map phases, providing a measure of the  
518 map geometry. We investigated whether the gradient directions of the map of the  
519 affected hand were more variable than those of the unaffected hand and controls. As a  
520 measure of map gradient variability, we calculated the circular variance of the gradient  
521 angles of each flattened, two-dimensional, surface ROI (see "Evaluation of hand map  
522 geometry" for details).

523

524 The gradient directions of the map of the affected hand were not differently variable (i.e.  
525 not differently spread) from those of the unaffected hand and controls (Figure 7B). A  
526 Harrison-Kanji test with a within-subject factor 'side' and a between-subjects factor  
527 'group' on the gradient variances provided evidence for a main effect of side ( $F_{1,59} =$   
528  $4.813$ ,  $p = 0.032$ ,  $p\eta^2 = 0.079$ ,  $BF_{10} = 1.202$ ) and no evidence for a main effect of group  
529 ( $F_{1,59} = 2.243$ ,  $p = 0.140$ ,  $p\eta^2 = 0.038$ ,  $BF_{10} = 0.560$ ). We found weak and inconclusive  
530 evidence for an interaction between side and group ( $F_{1,59} = 3.889$ ,  $p = 0.071$ ,  $p\eta^2 =$   
531  $0.057$ ,  $BF_{10} = 0.971$ ). This suggests that the spread of map gradients, which is a  
532 measure of functional organization, was largely similar across groups.

533

534 Lastly, we tested whether there was a circular-linear correlation ( $r_{cl}$ ) between map  
535 gradient variability and disease duration. This analysis did not provide evidence for a  
536 relation between the (log-transformed) disease duration and the gradient variability of  
537 either the affected hand map ( $r_{cl} = 0.395$ ,  $p = 0.310$ ,  $BF_{10} = 0.066$ ) or the unaffected  
538 hand map ( $r_{cl} = 0.197$ ,  $p = 0.734$ ,  $BF_{10} = 0.034$ ).

539  
540

## 541 **Discussion**

542

543 We show that the cortical map of the fingertips of the CRPS hand in S1 is strikingly  
544 comparable to the map of the unaffected hand and controls in terms of area, location,  
545 orientation, and geometry. Although the area of the map of the affected hand was  
546 comparable to that of the unaffected hand and controls, it was modulated by disease  
547 duration, but not by pain intensity, pain sensitivity and upper limb disability: across  
548 participants, the longer was the duration of CRPS, the smaller was the area of the map  
549 of the CRPS hand. Our results do not exclude that other abnormalities may occur at S1  
550 level, such as excitability changes (Lenz et al., 2011; Di Pietro et al., 2013),  
551 morphological (Baliki et al., 2011; Pleger et al., 2014; cfr. van Velzen et al., 2016) and  
552 connectivity changes (Geha et al., 2008). However, our findings challenge or, at the very  
553 least, narrow the notion of S1 map reorganization in CRPS: if any map reorganization  
554 occurs, it does not appear to be directly related to pain.

555

556 These findings urge us to reconsider the mechanisms that are proposed to underpin  
557 CRPS (Marinus et al., 2011). They also compel us to reevaluate the rationale for (and  
558 mechanism of effect of) clinical interventions that aimed to reduce pain by “restoring”  
559 somatotopic representations with sensory discrimination training (Moseley et al., 2008b;  
560 Catley et al., 2014), or by correcting sensorimotor incongruences (which are thought to  
561 be induced by S1 reorganisation) with mirror therapy (McCabe et al., 2003) (but see  
562 Moseley and Gandevia, 2005; Moseley et al., 2008b). Although these interventions  
563 appear to offer clinical benefit (O'Connell et al., 2013), they are unlikely to engender a  
564 “restoration” of somatotopic representations in S1, which are largely comparable to  
565 those of controls.

566

### 567 ***Revisiting previous evidence of somatotopic reorganisation in CRPS***

568

569 Comparisons across different studies are inevitably challenging due to the complexity  
570 and variety of CRPS symptomatology; in previous studies, patients varied greatly in  
571 regard to the combination, severity and duration of their symptoms. Our study suggests  
572 that map size is probably related with disease duration, although only a longitudinal  
573 study could confirm a causal relationship.

574

575 There are also important methodological issues to consider. The notion of somatotopic  
576 reorganisation in CRPS was mostly based on studies that used imaging methods  
577 (EEG/MEG) with lower spatial resolution than fMRI (Juottonen et al., 2002; Maihofner et

578 al., 2003; Pleger et al., 2004; Vartiainen et al., 2008; Vartiainen et al., 2009). A more  
579 recent study used fMRI and measured the cortical distance between d1 and d5  
580 activation peaks (Di Pietro et al., 2015). This study partially confirmed former EEG/MEG  
581 findings, reporting that the d1-d5 distance in S1 was smaller for the affected hand than it  
582 was for the unaffected hand in CRPS patients. However, the representation of the  
583 affected hand was comparable to that of healthy controls, in agreement with the current  
584 results. Critically, the Di Pietro study (2015) found that the representation of the  
585 unaffected hand in CRPS patients was larger than that of controls, thus challenging the  
586 view that the representation of the affected hand is shrunk and suggesting that the  
587 representation of the unaffected hand is actually enlarged. The current results do not  
588 support either interpretation.

589

590 Three important limitations affect all previous studies, regardless of the imaging  
591 approach used. First, the approach taken to estimate map size is both indirect and  
592 incomplete, because it is based on the measurement of the Euclidean *distance* between  
593 the activation maxima of two fingers (d1 and d5). Instead, the *area* of the map of all  
594 fingers is a more direct and complete measure of map size. Second, Euclidean  
595 measures of cortical distances can be inaccurate because they disregard that the  
596 cortical surface is not flat, especially in the regions of the sulci. Third, Euclidean distance  
597 measures can be affected by non-topographical, structural changes in S1, which can be  
598 associated with CRPS (Baliki et al., 2011; Pleger et al., 2014). The latter two problems  
599 can be overcome by morphing activation maps onto a reconstruction of the flattened  
600 cortical surface (Makin et al., 2013a; Kikkert et al., 2016), but previous studies on CRPS  
601 patients have not taken this approach. Altogether, these methodological issues can  
602 affect both the accuracy and validity of previous measures of map extent.

603

604

### 605 ***Stability of cortical topographies***

606

607 Recent fMRI studies (Makin et al., 2013a; Kikkert et al., 2016) suggest that finger  
608 topographies in S1 are surprisingly persistent even in humans who suffered amputation  
609 of the upper-limb. It was demonstrated that the area, location and functional organisation  
610 of the S1 maps of the missing hand were similar, although noisier, to those observed in  
611 controls during finger movements (Makin et al., 2013a; Kikkert et al., 2016). It has also  
612 been shown that the deafferented territory in human S1 can respond to somatotopically  
613 adjacent body regions (i.e. the lip for upper limb amputees) (Flor et al., 1995; Flor,  
614 2008), or to body regions that the amputees overuse to supplement lost hand function  
615 (e.g. the intact hand). This results in a highly idiosyncratic remapping which does not  
616 necessarily involve adjacent representations in S1 (Makin et al., 2013b; Philip and Frey,  
617 2014). Thus, cortical reorganisation in amputees is not dictated by cortical topographies,  
618 but can depend on compensatory use of other body parts. Similarly, short-term shifts in  
619 S1 maps can occur in healthy participants after surgical gluing of the index and middle  
620 fingers for 24 hours. These changes are thought to depend on compensatory use of the  
621 fourth and fifth fingers (Kolasinski et al., 2016b). These studies support the view that any

622 S1 change previously reported in CRPS patients might not directly related to pain, but it  
623 remains to be determined why map shrinkage relates to disease duration. Could it be  
624 related to hand use? We found no relation between map size and severity of the upper  
625 limb disability.

626

627 Recent evidence from electrophysiological and inactivation studies in monkeys suggests  
628 that the reorganisation following nerve transection originates, not in S1, but in the  
629 brainstem. Indeed, inactivating the cuneate nucleus abolishes the neural activity in the  
630 deafferented limb representation in S1 elicited by face stimulation (Kambi et al., 2014).  
631 Hence, loss of input from a body region in adulthood may lead to the formation or  
632 potentiation of lateral connections in the brainstem, which gives rise to a new pathway  
633 from periphery to cortex. It is not clear whether this new pathway contributes to cortical  
634 reorganisation, but the original pathway seems to be relatively spared even under the  
635 extreme circumstance of limb amputation (Makin and Bensmaia, 2017).

636

637 Some resistance to change has also been described for visual retinotopic maps.  
638 Although it has been shown that large lesions to the retina in adult mammals can induce  
639 a reorganization of retinotopic cortical maps in primary visual cortex (Kaas et al., 1990),  
640 more recent studies have reported that the topography of the macaque primary visual  
641 cortex does not change (for at least seven months) following binocular retinal lesions  
642 (Smirnakis et al., 2005). Similarly, severe eye diseases such as retinal degeneration do  
643 not seem to affect retinotopic representations in the human early visual cortex (Xie et al.,  
644 2012; Haak et al., 2016). Altogether, these findings suggest that cortical topography is  
645 more stable and resistant to change than what it was initially thought.

646

## 647 **Conclusion and future directions**

648 Our study provides the most complete characterization, to date, of the S1 somatotopy of  
649 the CRPS hand. We report that the S1 representation of the CRPS hand is comparable,  
650 at the group level, to that of the healthy hand, in terms of cortical area, location and  
651 geometry. The area of the S1 map of the CRPS hand is related to disease duration but  
652 not to pain intensity, pain sensitivity and upper limb disability. Future longitudinal studies  
653 are required to determine how the map changes over time and its effect on sensorimotor  
654 function.

655

656

## 657 **Figure captions**

658

659 **Figure 1.** *Preliminary results that guided the design of the finger mapping protocol. (A)*  
660 *Comparable somatotopic representation in the contralateral S1 to unilateral and bilateral*  
661 *finger stimulation, at within-subject level. The map of the fingertips (d2-d5) in*  
662 *contralateral S1 was strikingly similar in a condition in which we stimulated the fingertips*  
663 *of one hand at time and in another condition whereby we stroked homologous fingertips*  
664 *of both hands simultaneously. (B) Bootstrapping validation. We validated the results*  
665 *shown in panel A using a bootstrapping approach. Seven functional runs per condition*



666 (unilateral stimulation, bilateral stimulation) were collected in a single participant, in  
667 multiple scanning sessions. We selected, both recursively and randomly, 4 runs among  
668 the 7 collected per condition and averaged results across these 4 runs to assess intra-  
669 individual map reproducibility. The maps of the fingertips were highly reproducible in  
670 both unilateral and bilateral stimulation conditions. (C) *Time course of activity in the left*  
671 *hemisphere during unilateral fingertip stimulation.* Panel C shows the percent modulation  
672 of BOLD response in the left S1 induced by periodic stimulation of the fingertips of the  
673 right hand and left hand. We did not observed a spatially-tuned activation of the left S1  
674 induced by left-hand stimulation.

675

676 **Figure 2.** (A) *Phase-encoded stimulation procedure.* The tip of the index finger (red, d2),  
677 middle finger (green, d3), ring finger (blue, d4), little finger (yellow, d5) were stimulated in  
678 succession, in repeated cycles (12 cycles per run). To reduce scanning time, the  
679 homologous fingers of the right and left hands were stimulated simultaneously. (B)  
680 *Illustrative phase-encoded response to periodic fingertip stimulation.* The figure shows  
681 the raw Blood-Oxygen-Level-Dependent (BOLD) response in four voxels of interest (thin  
682 lines; data were motion-corrected and the linear trend removed). The locations of the  
683 voxels are marked with a star on the cortical surface of the left primary somatosensory  
684 cortex of one participant. The thicker lines represent the average of the raw BOLD  
685 response across 12 cycles of stimulation. The transversal, dashed, white line is  
686 displayed to facilitate the visualization of the shift of the phase of the BOLD response  
687 across the four voxels. The F-statistics of the signal at different phases are rendered on  
688 the inflated cortical surface and color-coded as in panel A (cluster-corrected  $p < 0.01$ ).  
689 Phases corresponding to rest have been truncated.

690

691 **Figure 3.** *Phase maps of the hand in an illustrative control participant and three CRPS*  
692 *patients.* The color-coding scheme used is shown on the top of the figure and is the  
693 same as in Figure 1: red = d2, green = d3, blue = d4, yellow = d5. Phases corresponding  
694 to rest have been truncated. Statistical thresholding and cluster correction at  $p < 0.01$   
695 was applied to each individual-participant data. CS: central sulcus. The star symbol  
696 denotes the map of the CRPS hand.

697

698 **Figure 4.** *Surface-based average of phase maps in controls, patients with CRPS to the*  
699 *right hand, and patients with CRPS to the left hand.* The complex-valued mapping data  
700 were averaged in a spherical surface coordinate system after morphing each subject's  
701 data into alignment with an average spherical sulcal pattern, and the F-statistics were  
702 rendered back onto an average unfolded cortical surface (Freesurfer's *fsaverage*,  
703 'inflated\_average'; uncorrected  $p < 0.05$  only for illustration). The color-coding scheme  
704 used is shown on the top of the figure and is the same as in Figures 1-2: red = d2, green  
705 = d3, blue = d4, yellow = d5. Phases corresponding to rest have been truncated. CS:  
706 central sulcus; PoCS: post-central sulcus.

707

708 **Figure 5.** (A) *Area of the hand map in S1.* The area of the hand map ( $\text{mm}^2$ ) in the left  
709 hemisphere and right hemisphere is plotted for each group and individual participant. To

710 facilitate comparison, data from the two CRPS groups (right hand CRPS, left hand  
711 CRPS) were pooled, after flipping the data from one group (right hand CRPS) so that the  
712 affected side is the left hand/right hemisphere in all patients. (B) *No relation between*  
713 *map area and CRPS duration*. The top plot shows the lack of relation between the S1  
714 map of the healthy hand and CRPS duration, whereas the bottom plot shows the weak  
715 (not significant) relation between the S1 map of the affected hand and disease duration.

716

717 **Figure 6.** (A-B) *Spatial distribution of map centroids*. The location of the centroid of the  
718 hand map in each individual subject is displayed on an average spherical cortical  
719 surface. An arbitrary reference point on the central sulcus is marked with a white cross.  
720 (C) *Geodesic distance (mm) between each map centroid and a reference point ('+')*  
721 *on the central sulcus*. To facilitate comparison, data from the two CRPS groups (right hand  
722 CRPS, left hand CRPS) were pooled, after flipping the data from one group (right hand  
723 CRPS) so that the affected side is the left hand/right hemisphere in all patients.

724

725 **Figure 7.** (A) *Gradients of the hand map*. Gradients of a single-subject phase map are  
726 displayed as cyan arrows over a flattened (2D) cortical surface patch. The gradient  
727 points in the direction of the greatest rate of increase of the function (i.e. the direction of  
728 the phase shift in the hand map). The color-coding scheme of the hand map is the same  
729 as in Figures 1-3: red = d2, green = d3, blue = d4, yellow = d5. (B) *Variability of hand*  
730 *map gradients*. The circular variance of map gradient directions is displayed for each  
731 participant and condition (side: left hemisphere, right hemisphere; group: controls, CRPS  
732 patients). The color-coding scheme for panel B is shown at the bottom of the figure. To  
733 facilitate comparison, data from the two CRPS groups (right hand CRPS, left hand  
734 CRPS) were pooled, after flipping the data from one group (right hand CRPS) so that the  
735 affected side is the left hand/right hemisphere in all patients.

736

737

### 738 **Author contributions**

739

740 FM, APW, MMS, JHM, GDI, MIS, GLM, CR conceived and designed the study. APW,  
741 MMS, ZJI collected the neuroimaging data. APW analysed the clinical data. FM  
742 analysed the imaging data. FM wrote the initial draft of the manuscript. All authors edited  
743 the manuscript.

744

745

### 746 **Acknowledgments**

747

748 We acknowledge the support of the Australian National Imaging Facility, a National  
749 Collaborative Research Infrastructure Strategy (NCRIS) capability. We are grateful to Dr  
750 Michael Green and to the staff of NeuRA Imaging. FM and GDI were supported by a  
751 Wellcome Trust Strategic Award (COLL JLARAXR). GDI was additionally supported by a  
752 ERC Consolidator Grant (PAINSTRAT). APW was supported by educational grants from  
753 the Australian Pain Society/Australian Pain Relief Association, Mundipharma (PhD



754 Scholar #3) and NeuRA. GLM was supported by a research fellowship from the National  
755 Health and Medical Research Council (NHMRC) of Australia (ID 1061279). This study  
756 was supported by a project grant from the NHMRC (ID 630431).

757

758

759 **Potential conflicts of interest**

760

761 Dr Mancini reports grants from EFIC Grunenthal, outside the submitted work. Dr Wang  
762 reports grants from Mundipharma and Australian Pain Society/Australian Pain Relief  
763 Association, during the conduct of the study. GLM receives royalties from books on pain,  
764 CRPS and rehabilitation and speaker's fees for lectures on pain, performance and  
765 rehabilitation, outside the submitted work. He has also received support from Pfizer,  
766 Workers' Compensation Boards in Australia, Europe and North America, AIA Australia,  
767 the International Olympic Committee, Port Adelaide Football Club and Arsenal Football  
768 Club, outside the submitted work. No other author states any conflict of interest.

769

## 770 **References**

771

- 772 Ann Stringer E, Qiao P-G, Friedman RM, Holroyd L, Newton AT, Gore JC, Min Chen L  
773 (2014) Distinct fine-scale fMRI activation patterns of contra- and ipsilateral  
774 somatosensory areas 3b and 1 in humans. *Human Brain Mapping* 35:4841-4857.
- 775 Baliki MN, Schnitzer TJ, Bauer WR, Apkarian AV (2011) Brain morphological signatures  
776 for chronic pain. *PLoS One* 6:e26010.
- 777 Berens P (2009) CircStat: A MATLAB toolbox for circular statistics. *J Stat Soft* 31:1-21.
- 778 Berlot E, Prichard G, Reilly J, Ejaz N, Diedrichsen J (2018) Ipsilateral finger  
779 representations are engaged in active movement, but not sensory processing.  
780 *bioRxiv*:285809.
- 781 Besle J, Sanchez-Panchuelo RM, Bowtell R, Francis S, Schluppeck D (2013) Single-  
782 subject fMRI mapping at 7 T of the representation of fingertips in S1: a  
783 comparison of event-related and phase-encoding designs. *J Neurophysiol*  
784 109:2293-2305.
- 785 Catley MJ, O'Connell NE, Berryman C, Ayhan FF, Moseley GL (2014) Is tactile acuity  
786 altered in people with chronic pain? a systematic review and meta-analysis. *J*  
787 *Pain* 15:985-1000.
- 788 Chen CF, Kreutz-Delgado K, Sereno MI, Huang RS (2017) Validation of periodic fMRI  
789 signals in response to wearable tactile stimulation. *Neuroimage* 150:99-111.
- 790 Di Pietro F, Stanton TR, Moseley GL, Lotze M, McAuley JH (2015) Interhemispheric  
791 somatosensory differences in chronic pain reflect abnormality of the healthy side.  
792 *Hum Brain Mapp* 36:508-518.
- 793 Di Pietro F, Stanton TR, Moseley GL, Lotze M, McAuley JH (2016) An exploration into  
794 the cortical reorganisation of the healthy hand in upper-limb complex regional  
795 pain syndrome. *Scand J Pain* 13:18-24.
- 796 Di Pietro F, McAuley JH, Parkitny L, Lotze M, Wand BM, Moseley GL, Stanton TR  
797 (2013) Primary somatosensory cortex function in complex regional pain  
798 syndrome: a systematic review and meta-analysis. *J Pain* 14:1001-1018.
- 799 Fischl B, Sereno MI, Dale AM (1999) Cortical surface-based analysis. II: Inflation,  
800 flattening, and a surface-based coordinate system. *NeuroImage* 9:195-207.
- 801 Fisher R (1953) Dispersion on a Sphere. *Proc R Soc Lon Ser-A* 217:295-305.
- 802 Flor H (2008) Maladaptive plasticity, memory for pain and phantom limb pain: review and  
803 suggestions for new therapies. *Expert Rev Neurother* 8:809-818.
- 804 Flor H, Elbert T, Knecht S, Wienbruch C, Pantev C, Birbaumer N, Larbig W, Taub E  
805 (1995) Phantom-limb pain as a perceptual correlate of cortical reorganization  
806 following arm amputation. *Nature* 375:482-484.
- 807 Fornander L, Nyman T, Hansson T, Brismar T, Engström M (2016) Inter-hemispheric  
808 plasticity in patients with median nerve injury. *Neuroscience Letters* 628:59-66.
- 809 Foss JM, Apkarian AV, Chialvo DR (2006) Dynamics of pain: fractal dimension of  
810 temporal variability of spontaneous pain differentiates between pain States. *J*  
811 *Neurophysiol* 95:730-736.
- 812 Geha PY, Baliki MN, Harden RN, Bauer WR, Parrish TB, Apkarian AV (2008) The brain  
813 in chronic CRPS pain: abnormal gray-white matter interactions in emotional and  
814 autonomic regions. *Neuron* 60:570-581.
- 815 Geva R, Tal Z, Amedi A (2017) Positive and Negative Somatotopic BOLD Responses in  
816 Contralateral Versus Ipsilateral Penfield Homunculus. *Cerebral Cortex* 27:962-  
817 980.
- 818 Haak KV, Morland AB, Rubin GS, Cornelissen FW (2016) Preserved retinotopic brain  
819 connectivity in macular degeneration. *Ophthalmic Physiol Opt* 36:335-343.

- 820 Hagler DJ, Jr., Saygin AP, Sereno MI (2006) Smoothing and cluster thresholding for  
821 cortical surface-based group analysis of fMRI data. *NeuroImage* 33:1093-1103.
- 822 Harden RN, Bruehl S, Perez RS, Birklein F, Marinus J, Maihofner C, Lubenow T,  
823 Buvanendran A, Mackey S, Graciosa J, Mogilevski M, Ramsden C, Chont M,  
824 Vatine JJ (2010) Validation of proposed diagnostic criteria (the "Budapest  
825 Criteria") for Complex Regional Pain Syndrome. *Pain* 150:268-274.
- 826 Harrison D, Kanji GK (1988) The development of analysis of variance for circular data.  
827 *Journal of Applied Statistics* 15:197.
- 828 Held L, Ott M (2018) On p-Values and Bayes Factors. *Annual Review of Statistics and  
829 Its Application* 5:393-419.
- 830 Helmich RCG, Bäumer T, Siebner HR, Bloem BR, Münchau A (2005) Hemispheric  
831 asymmetry and somatotopy of afferent inhibition in healthy humans.  
832 *Experimental Brain Research* 167:211-219.
- 833 Hlushchuk Y, Hari R (2006) Transient Suppression of Ipsilateral Primary Somatosensory  
834 Cortex during Tactile Finger Stimulation. *The Journal of Neuroscience* 26:5819.
- 835 Hutchinson EB, Rutecki PA, Alexander AL, Sutula TP (2012) Fisher statistics for  
836 analysis of diffusion tensor directional information. *J Neurosci Methods* 206:40-  
837 45.
- 838 Jones EG, Hendry SHC (1980) Distribution of callosal fibers around the hand  
839 representations in monkey somatic sensory cortex. *Neuroscience Letters* 19:167-  
840 172.
- 841 Juottonen K, Gockel M, Silen T, Hurri H, Hari R, Forss N (2002) Altered central  
842 sensorimotor processing in patients with complex regional pain syndrome. *Pain*  
843 98:315-323.
- 844 Kaas JH, Krubitzer LA, Chino YM, Langston AL, Polley EH, Blair N (1990)  
845 Reorganization of retinotopic cortical maps in adult mammals after lesions of the  
846 retina. *Science* 248:229-231.
- 847 Kambi N, Halder P, Rajan R, Arora V, Chand P, Arora M, Jain N (2014) Large-scale  
848 reorganization of the somatosensory cortex following spinal cord injuries is due to  
849 brainstem plasticity. *Nat Commun* 5:3602.
- 850 Kennedy C, Beaton D, Solway S, McConnell S, Bombardier C (2011) Disabilities of the  
851 arm, shoulder and hand (DASH). The DASH and QuickDASH Outcome Measure  
852 User's Manual, Third Edition Toronto, Ontario: Institute for Work & Health.
- 853 Kikkert S, Kolasinski J, Jbabdi S, Tracey I, Beckmann CF, Johansen-Berg H, Makin TR  
854 (2016) Revealing the neural fingerprints of a missing hand. *Elife* 5.
- 855 Killackey HP, Gould lii HJ, Cusick CG, Pons TP, Kaas JH (1983) The relation of corpus  
856 callosum connections to architectonic fields and body surface maps in  
857 sensorimotor cortex of new and old world monkeys. *Journal of Comparative  
858 Neurology* 219:384-419.
- 859 Klingner CM, Huonker R, Flemming S, Hasler C, Brodoehl S, Preul C, Burmeister H,  
860 Kastrup A, Witte OW (2011) Functional deactivations: Multiple ipsilateral brain  
861 areas engaged in the processing of somatosensory information. *Human Brain  
862 Mapping* 32:127-140.
- 863 Kolasinski J, Makin TR, Jbabdi S, Clare S, Stagg CJ, Johansen-Berg H (2016a)  
864 Investigating the Stability of Fine-Grain Digit Somatotopy in Individual Human  
865 Participants. *J Neurosci* 36:1113-1127.
- 866 Kolasinski J, Makin TR, Logan JP, Jbabdi S, Clare S, Stagg CJ, Johansen-Berg H  
867 (2016b) Perceptually relevant remapping of human somatotopy in 24 hours. *Elife*  
868 5.

- 869 Lenz M, Hoffken O, Stude P, Lissek S, Schwenkreis P, Reinersmann A, Frettlow J,  
870 Richter H, Tegenthoff M, Maier C (2011) Bilateral somatosensory cortex  
871 disinhibition in complex regional pain syndrome type I. *Neurology* 77:1096-1101.  
872 Lipton ML, Fu K-MG, Branch CA, Schroeder CE (2006) Ipsilateral Hand Input to Area 3b  
873 Revealed by Converging Hemodynamic and Electrophysiological Analyses in  
874 Macaque Monkeys. *The Journal of Neuroscience* 26:180.  
875 Maihofner C, Handwerker HO, Neundorfer B, Birklein F (2003) Patterns of cortical  
876 reorganization in complex regional pain syndrome. *Neurology* 61:1707-1715.  
877 Maihofner C, Handwerker HO, Neundorfer B, Birklein F (2004) Cortical reorganization  
878 during recovery from complex regional pain syndrome. *Neurology* 63:693-701.  
879 Maihofner C, Baron R, DeCol R, Binder A, Birklein F, Deuschl G, Handwerker HO,  
880 Schattschneider J (2007) The motor system shows adaptive changes in complex  
881 regional pain syndrome. *Brain* 130:2671-2687.  
882 Makin TR, Bensmaia SJ (2017) Stability of Sensory Topographies in Adult Cortex.  
883 *Trends Cogn Sci* 21:195-204.  
884 Makin TR, Scholz J, Filippini N, Henderson Slater D, Tracey I, Johansen-Berg H (2013a)  
885 Phantom pain is associated with preserved structure and function in the former  
886 hand area. *Nat Commun* 4:1570.  
887 Makin TR, Cramer AO, Scholz J, Hahamy A, Henderson Slater D, Tracey I, Johansen-  
888 Berg H (2013b) Deprivation-related and use-dependent plasticity go hand in  
889 hand. *Elife* 2:e01273.  
890 Mancini F, Haggard P, Iannetti GD, Longo MR, Sereno MI (2012) Fine-grained  
891 nociceptive maps in primary somatosensory cortex. *Journal of Neuroscience*  
892 32:17155-17162.  
893 Marinus J, Moseley GL, Birklein F, Baron R, Maihofner C, Kingery WS, van Hilten JJ  
894 (2011) Clinical features and pathophysiology of complex regional pain syndrome.  
895 *Lancet Neurology* 10:637-648.  
896 Martuzzi R, van der Zwaag W, Farthouat J, Gruetter R, Blanke O (2014) Human finger  
897 somatotopy in areas 3b, 1, and 2: a 7T fMRI study using a natural stimulus. *Hum*  
898 *Brain Mapp* 35:213-226.  
899 McCabe CS, Haigh RC, Ring EF, Halligan PW, Wall PD, Blake DR (2003) A controlled  
900 pilot study of the utility of mirror visual feedback in the treatment of complex  
901 regional pain syndrome (type 1). *Rheumatology (Oxford)* 42:97-101.  
902 Moseley GL, Gandevia SC (2005) Sensory-motor incongruence and reports of 'pain'.  
903 *Rheumatology (Oxford)* 44:1083-1085.  
904 Moseley GL, Zalucki NM, Wiech K (2008a) Tactile discrimination, but not tactile  
905 stimulation alone, reduces chronic limb pain. *Pain* 137:600-608.  
906 Moseley GL, Gallace A, Spence C (2008b) Is mirror therapy all it is cracked up to be?  
907 Current evidence and future directions. *Pain* 138:7-10.  
908 O'Connell NE, Wand BM, McAuley J, Marston L, Moseley GL (2013) Interventions for  
909 treating pain and disability in adults with complex regional pain syndrome.  
910 *Cochrane Database Syst Rev*:CD009416.  
911 Oldfield RC (1971) The assessment and analysis of handedness: the Edinburgh  
912 inventory. *Neuropsychologia* 9:97-113.  
913 Pelled G, Bergstrom DA, Tierney PL, Conroy RS, Chuang K-H, Yu D, Leopold DA,  
914 Walters JR, Koretsky AP (2009) Ipsilateral cortical fMRI responses after  
915 peripheral nerve damage in rats reflect increased interneuron activity.  
916 *Proceedings of the National Academy of Sciences* 106:14114.  
917 Philip BA, Frey SH (2014) Compensatory changes accompanying chronic forced use of  
918 the nondominant hand by unilateral amputees. *J Neurosci* 34:3622-3631.

- 919 Pleger B, Draganski B, Schwenkreis P, Lenz M, Nicolas V, Maier C, Tegenthoff M  
920 (2014) Complex regional pain syndrome type I affects brain structure in prefrontal  
921 and motor cortex. *PLoS ONE* 9:e85372.
- 922 Pleger B, Tegenthoff M, Ragert P, Forster AF, Dinse HR, Schwenkreis P, Nicolas V,  
923 Maier C (2005) Sensorimotor retuning [corrected] in complex regional pain  
924 syndrome parallels pain reduction. *Ann Neurol* 57:425-429.
- 925 Pleger B, Tegenthoff M, Schwenkreis P, Janssen F, Ragert P, Dinse HR, Volker B, Zenz  
926 M, Maier C (2004) Mean sustained pain levels are linked to hemispherical side-  
927 to-side differences of primary somatosensory cortex in the complex regional pain  
928 syndrome I. *Experimental Brain Research* 155:115-119.
- 929 Reed JL, Qi H-X, Kaas JH (2011) Spatiotemporal Properties of Neuron Response  
930 Suppression in Owl Monkey Primary Somatosensory Cortex When Stimuli Are  
931 Presented to Both Hands. *The Journal of Neuroscience* 31:3589.
- 932 Sanchez-Panchuelo RM, Francis S, Bowtell R, Schluppeck D (2010) Mapping human  
933 somatosensory cortex in individual subjects with 7T functional MRI. *J*  
934 *Neurophysiol* 103:2544-2556.
- 935 Sanchez-Panchuelo RM, Besle J, Beckett A, Bowtell R, Schluppeck D, Francis S (2012)  
936 Within-digit functional parcellation of Brodmann areas of the human primary  
937 somatosensory cortex using functional magnetic resonance imaging at 7 tesla. *J*  
938 *Neurosci* 32:15815-15822.
- 939 Sereno MI, Huang RS (2014) Multisensory maps in parietal cortex. *Curr Opin Neurobiol*  
940 24:39-46.
- 941 Sereno MI, Dale AM, Reppas JB, Kwong KK, Belliveau JW, Brady TJ, Rosen BR, Tootell  
942 RB (1995) Borders of multiple visual areas in humans revealed by functional  
943 magnetic resonance imaging. *Science* 268:889-893.
- 944 Shenker N, Goebel A, Rockett M, Batchelor J, Jones GT, Parker R, de CWAC, McCabe  
945 C (2015) Establishing the characteristics for patients with chronic Complex  
946 Regional Pain Syndrome: the value of the CRPS-UK Registry. *Br J Pain* 9:122-  
947 128.
- 948 Silver MA, Kastner S (2009) Topographic maps in human frontal and parietal cortex.  
949 *Trends Cogn Sci* 13:488-495.
- 950 Smart KM, Wand BM, O'Connell NE (2016) Physiotherapy for pain and disability in  
951 adults with complex regional pain syndrome (CRPS) types I and II. *Cochrane*  
952 *Database Syst Rev* 2:CD010853.
- 953 Smirnakis SM, Brewer AA, Schmid MC, Tolia AS, Schuz A, Augath M, Inhoffen W,  
954 Wandell BA, Logothetis NK (2005) Lack of long-term cortical reorganization after  
955 macaque retinal lesions. *Nature* 435:300-307.
- 956 Tommerdahl M, Simons SB, Chiu JS, Favorov O, Whitsel BL (2006) Ipsilateral input  
957 modifies the primary somatosensory cortex response to contralateral skin flutter.  
958 *J Neurosci* 26:5970-5977.
- 959 van Velzen GA, Rombouts SA, van Buchem MA, Marinus J, van Hilten JJ (2016) Is the  
960 brain of complex regional pain syndrome patients truly different? *Eur J Pain*  
961 20:1622-1633.
- 962 Vartiainen N, Kirveskari E, Kallio-Laine K, Kalso E, Forss N (2009) Cortical  
963 reorganization in primary somatosensory cortex in patients with unilateral chronic  
964 pain. *J Pain* 10:854-859.
- 965 Vartiainen NV, Kirveskari E, Forss N (2008) Central processing of tactile and nociceptive  
966 stimuli in complex regional pain syndrome. *Clin Neurophysiol* 119:2380-2388.
- 967 Wang AP, Butler AA, Valentine JD, Rae CD, McAuley JH, Gandevia SC, Moseley GL  
968 (2019) A Novel Finger Illusion Reveals Reduced Weighting of Bimanual Hand

- 969 Cortical Representations in People With Complex Regional Pain Syndrome. The  
970 Journal of Pain 20:171-180.  
971 Watson G (1956) Analysis of dispersion on a sphere. Geophysical Journal International  
972 7:153-159.  
973 Xie J, Wang GJ, Yow L, Humayun MS, Weiland JD, Cela CJ, Jadvar H, Lazzi G,  
974 Dhrami-Gavazi E, Tsang SH (2012) Preservation of retinotopic map in retinal  
975 degeneration. Exp Eye Res 98:88-96.  
976 Zar LH (1999) Biostatistical Analysis, 4th Edition: Prentice Hill.  
977



**A Comparable somatotopic representation in the contralateral hemisphere to unilateral and bilateral (simultaneous) stimulation**

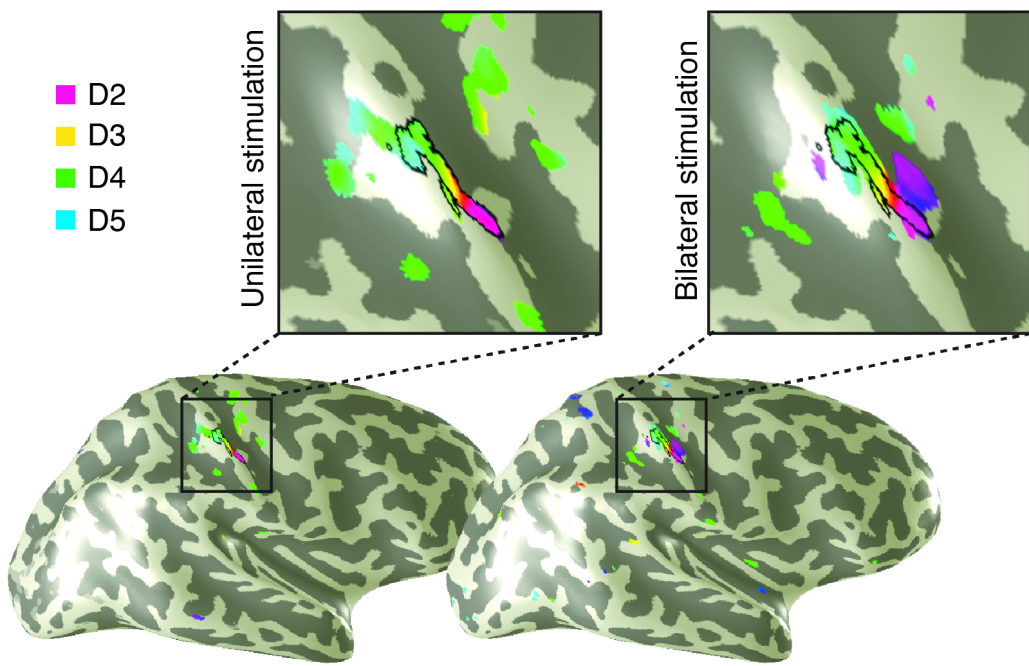

**B Bootstrapping validation**  
Average of 4 different scans to assess within-subject reproducibility

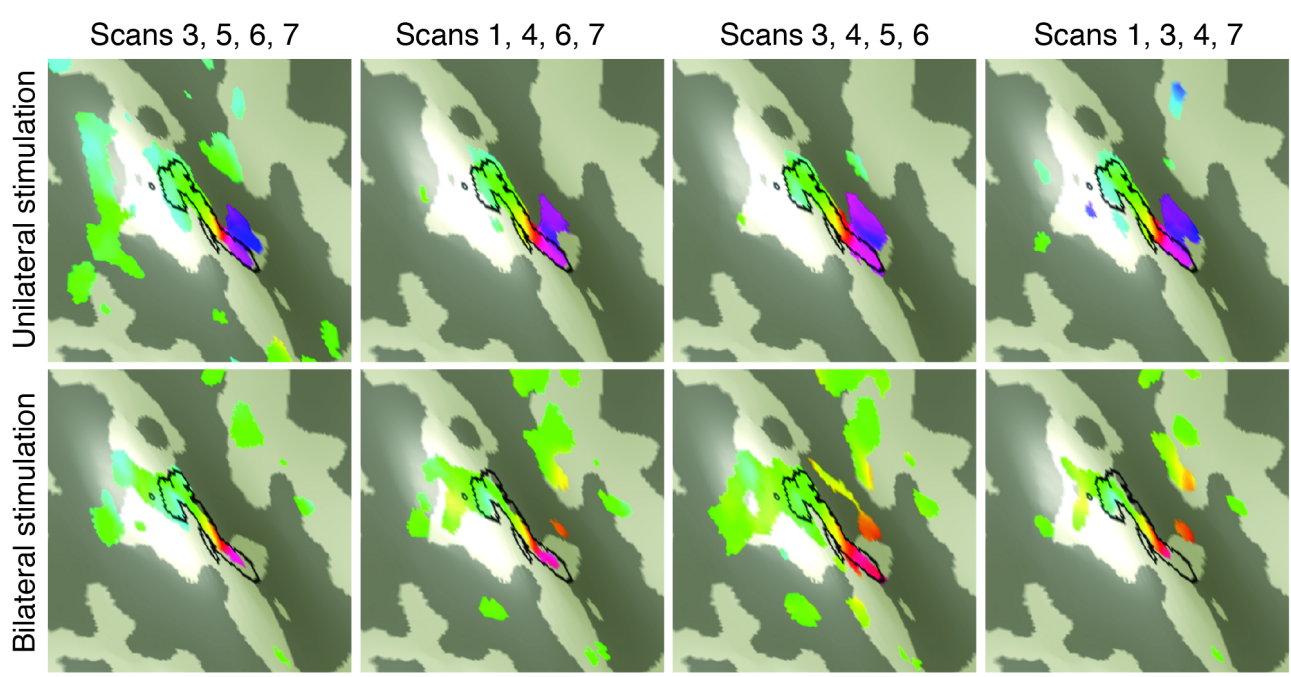

**C Timecourse of activity in left hemisphere for unilateral stimulation**

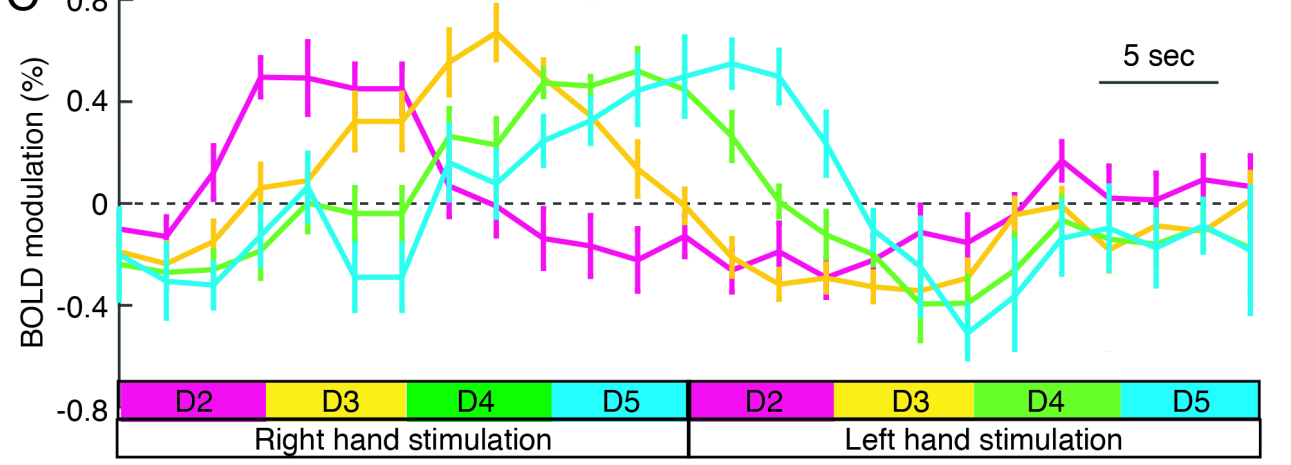



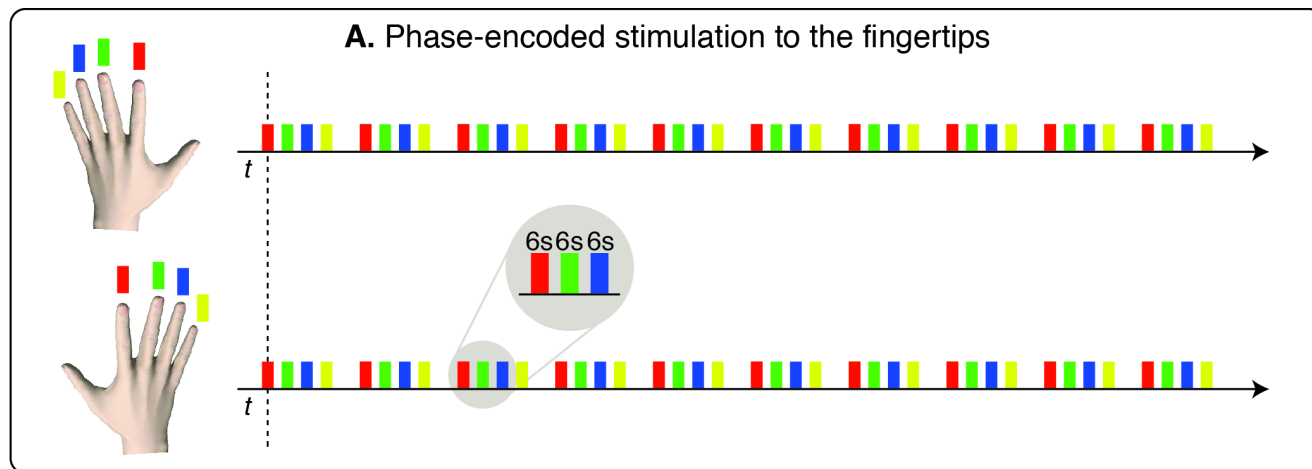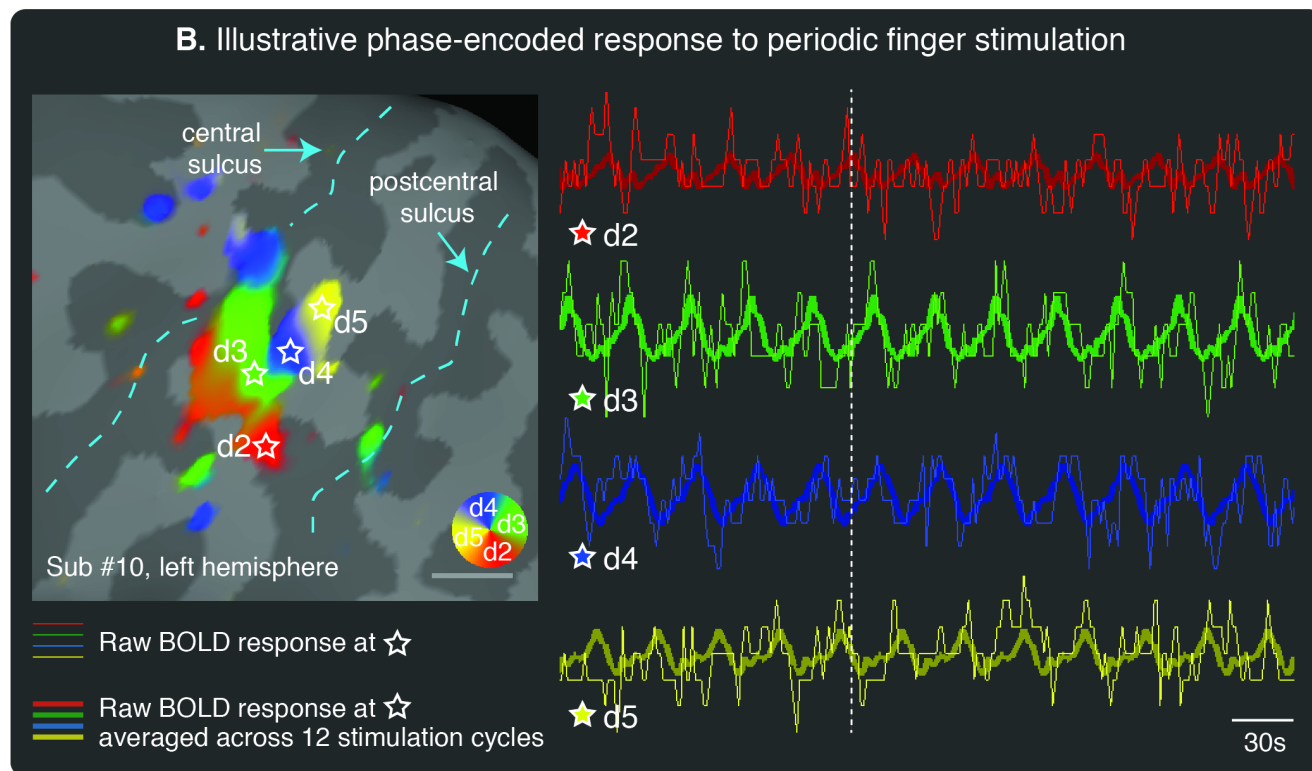

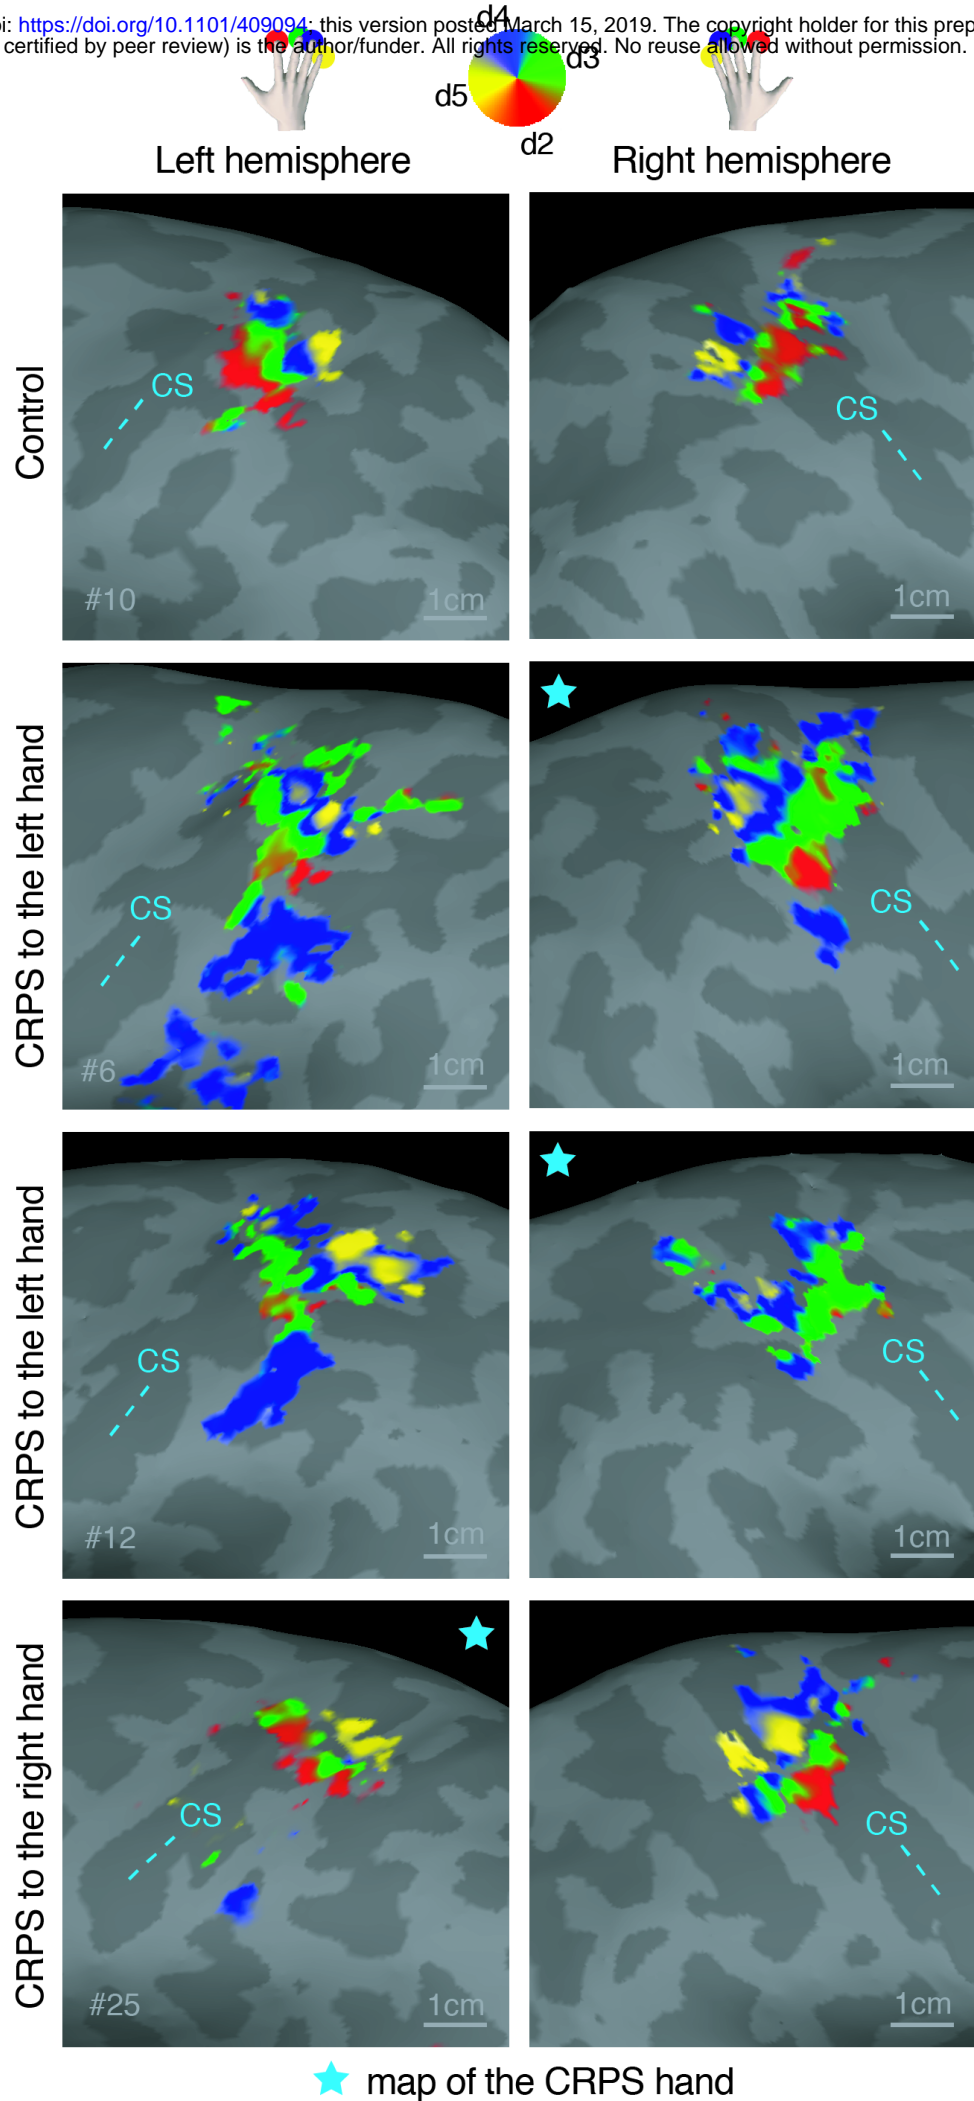

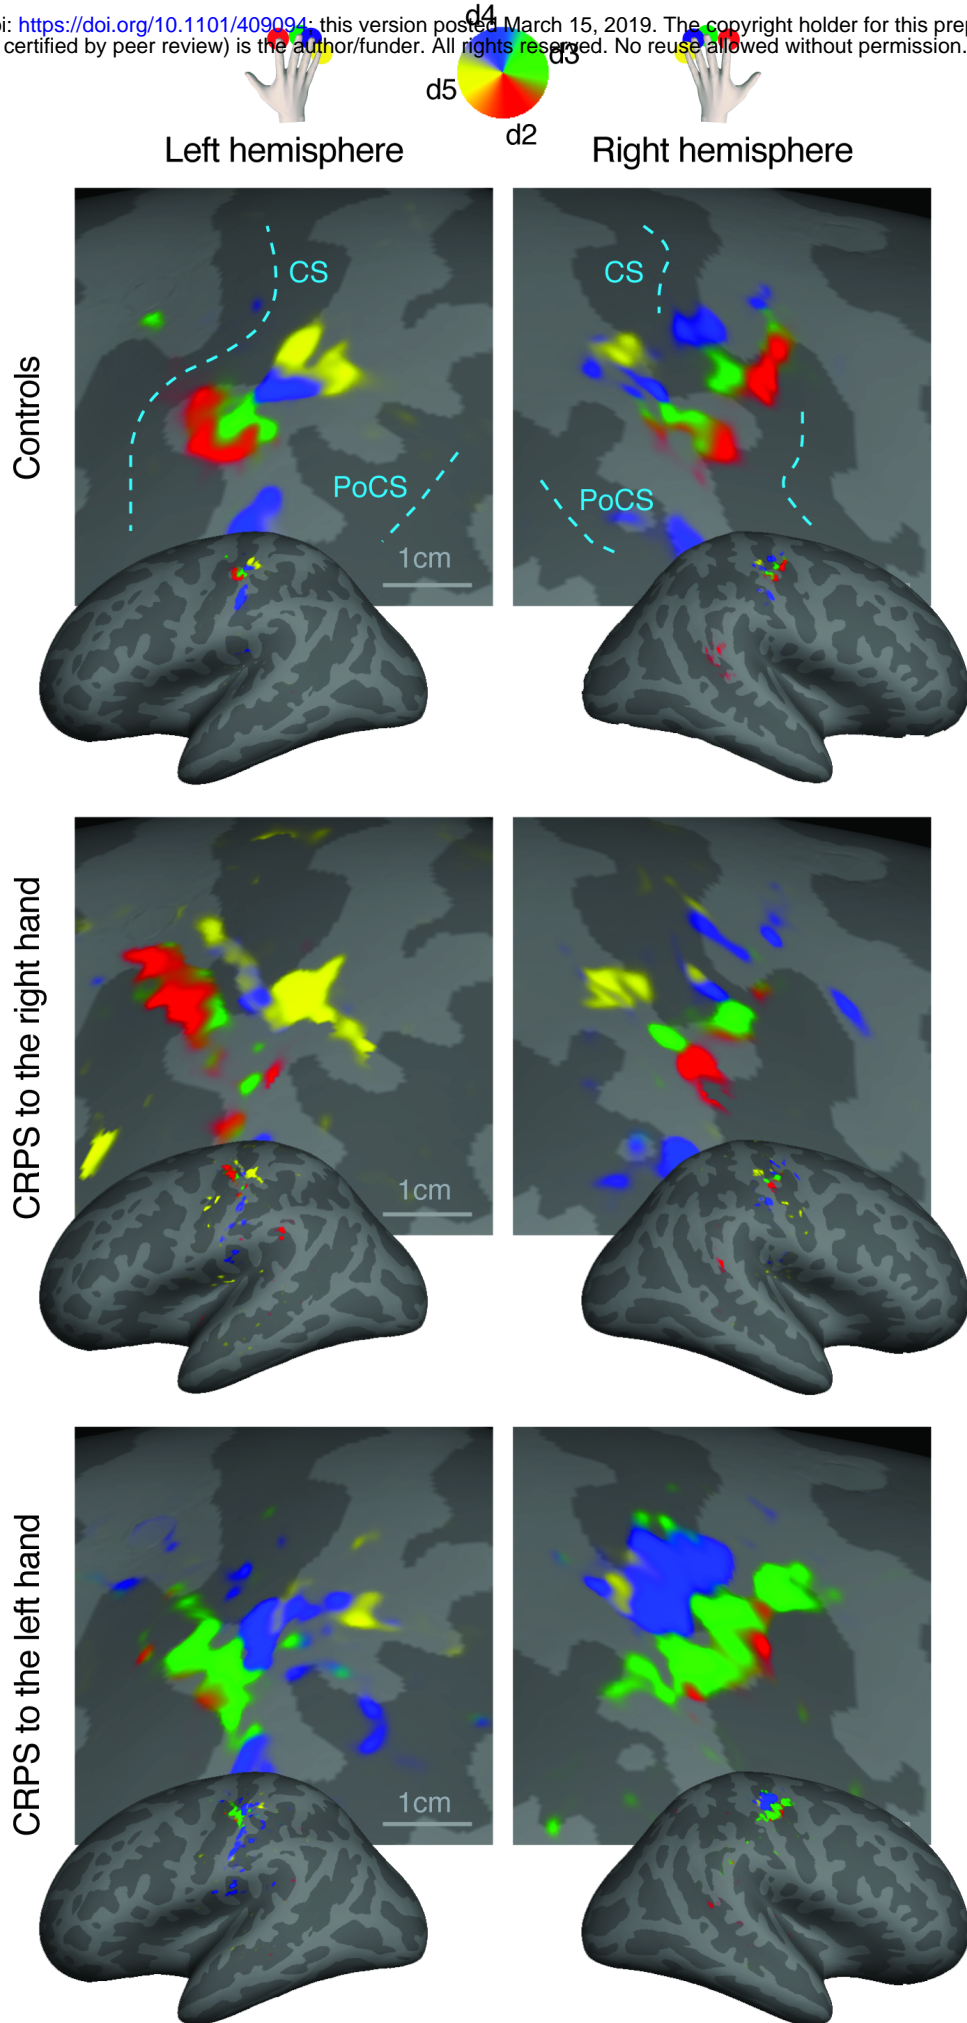

### A. Map Area

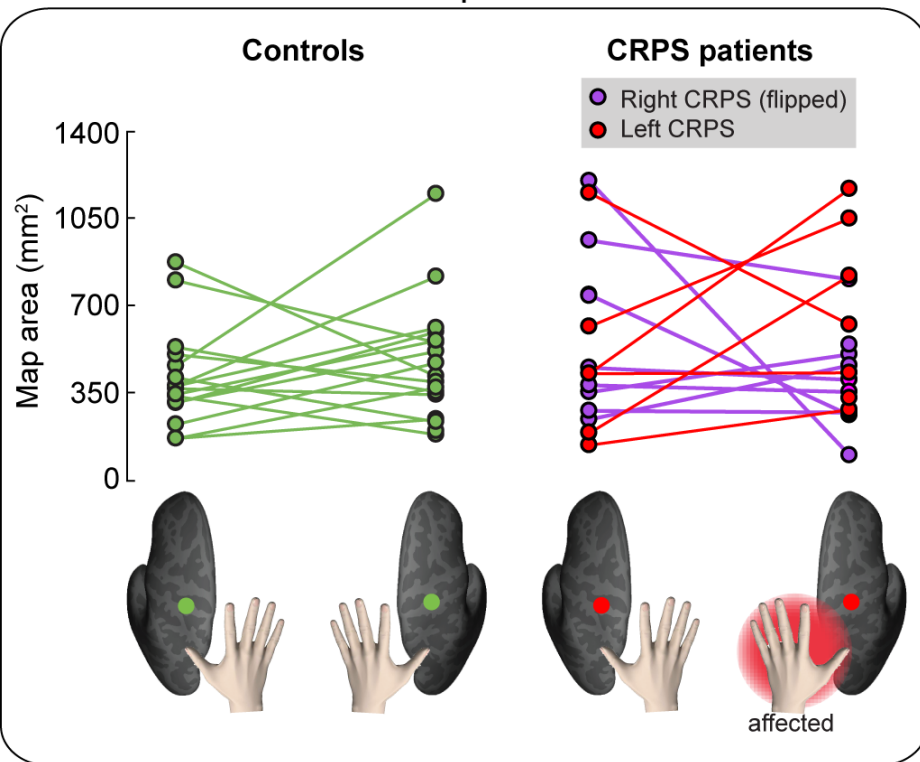

### B. Map Area by CRPS duration

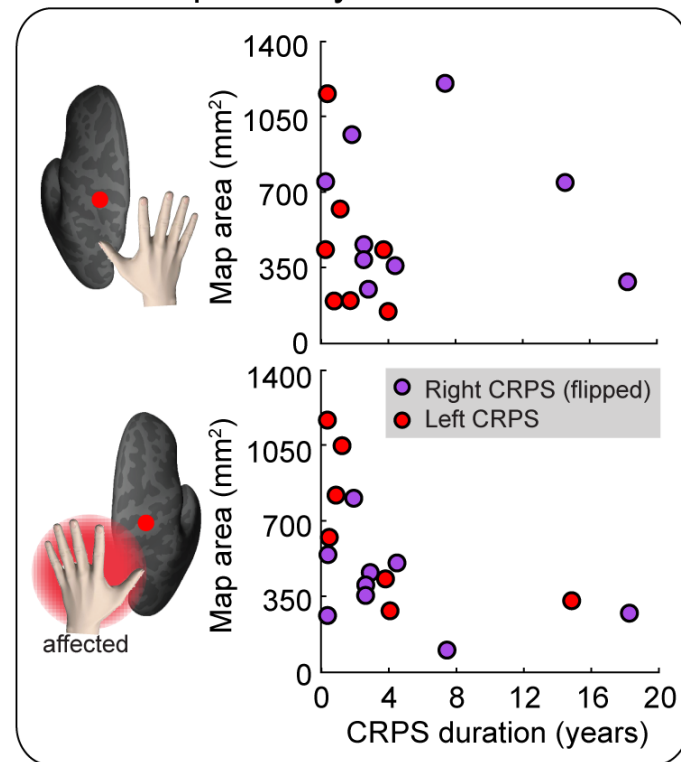



## Location of map centroid

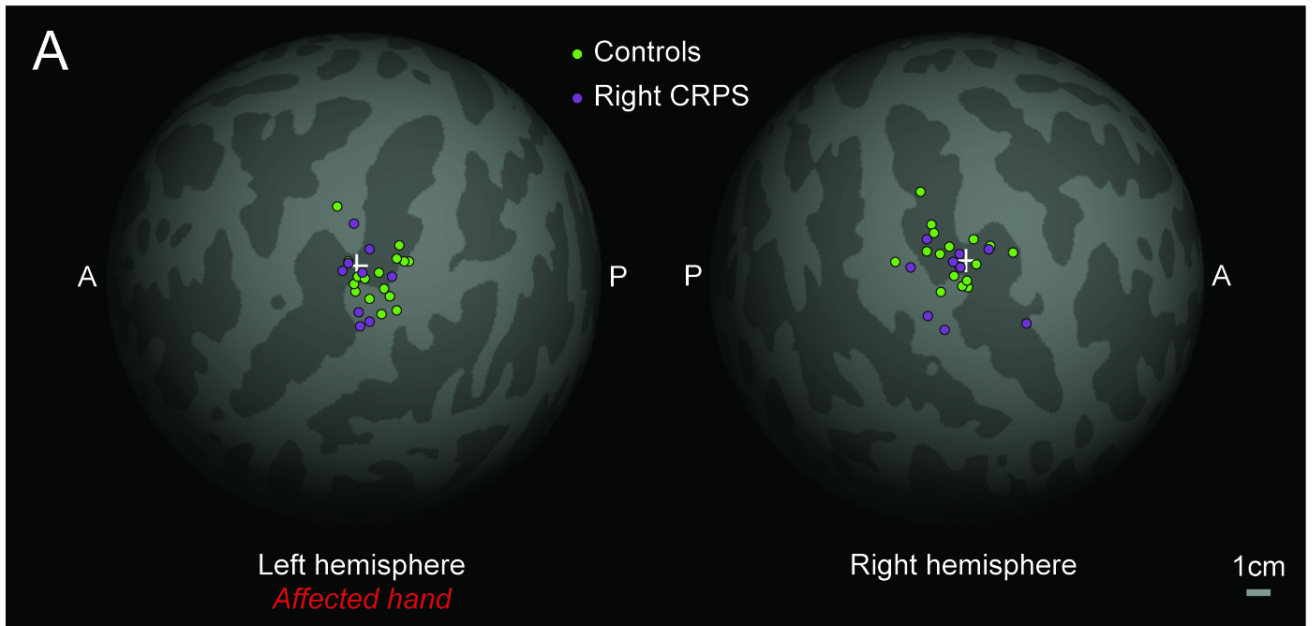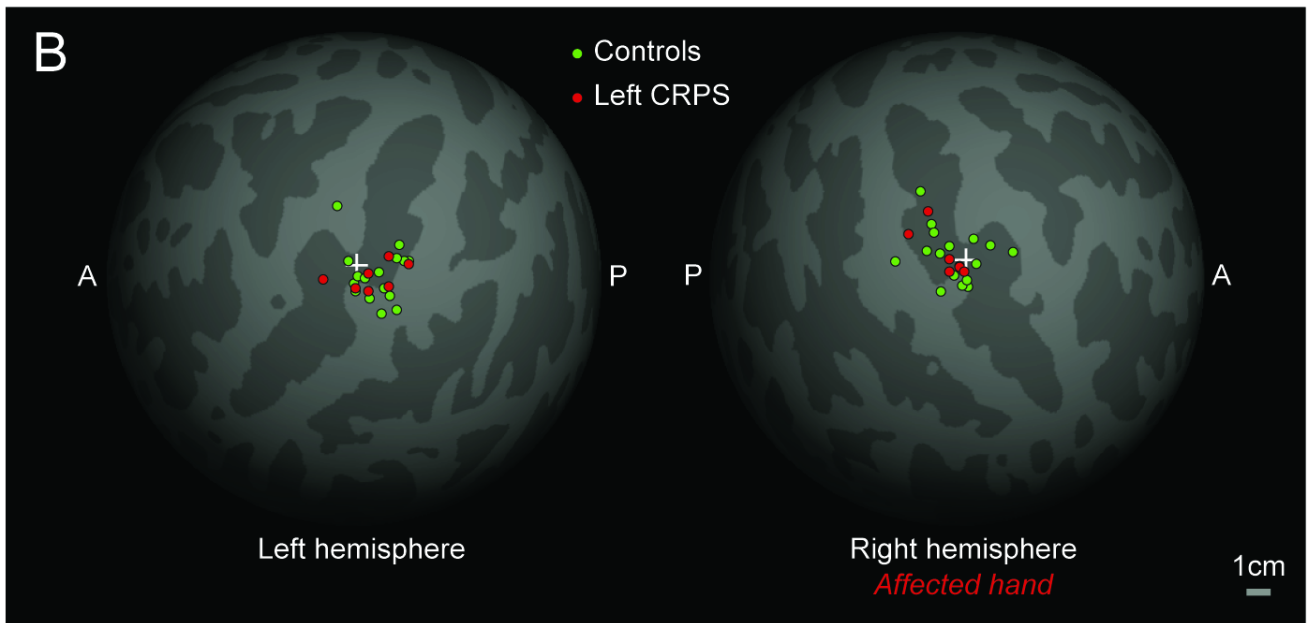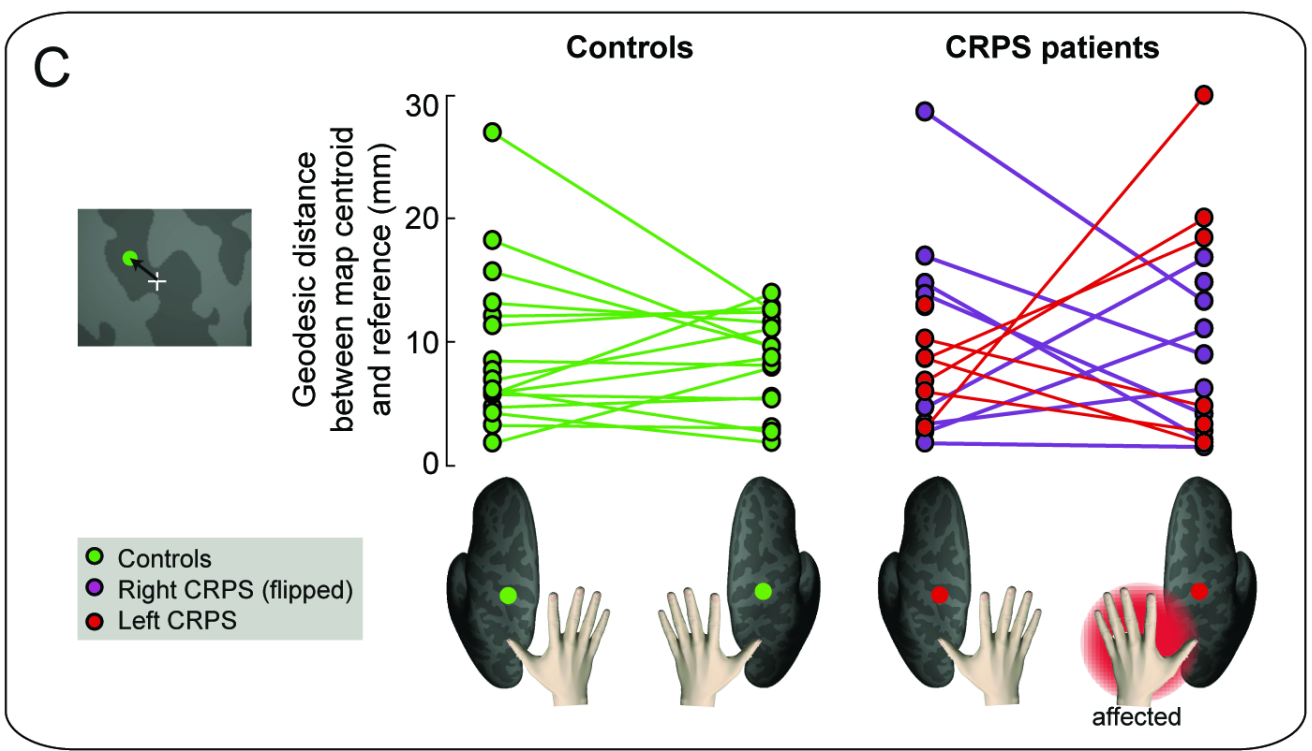

### A. Gradients of hand map

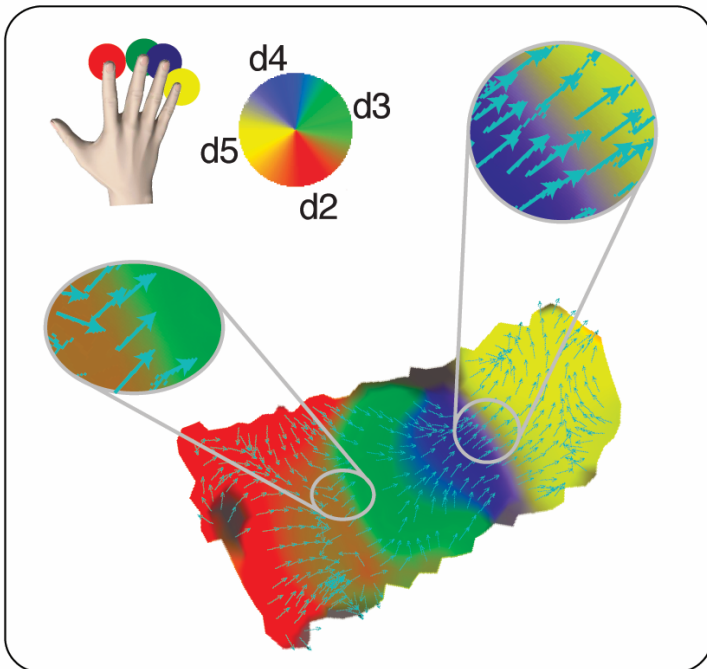

### B. Variance of map gradients

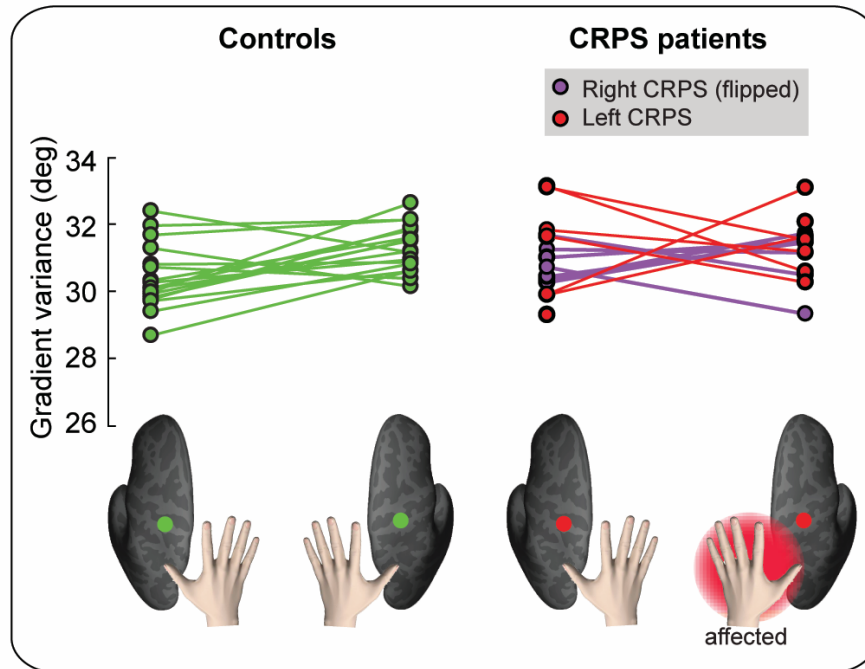

**Table 1.** Demographic and clinical information of the study sample.

Range of motion, motor weakness, tremor, allodynia: ‘-’ indicates no abnormality, whereas ‘+’ indicates presence of a symptom. Intensity of pain to the upper limb during scans were evaluated on a Likert scale from 0 (no pain) to 10 (worst pain imaginable). PPT indicates the Pressure Pain threshold and is reported in kg/cm<sup>2</sup> units. The laterality score is derived from the Edinburgh Handedness Inventory and ranges from -100 (left-hand dominant) to +100 (right-hand dominant).

| ID | Group   | Age  | Gender | CRPS Duration (y) | Incident at onset | Range of Motion | Motor weakness | Tremor | Allodynia | Pain rating during scan | PPT left hand | PPT right hand | Laterality score |
|----|---------|------|--------|-------------------|-------------------|-----------------|----------------|--------|-----------|-------------------------|---------------|----------------|------------------|
| 4  | Control | 38.5 | F      | n/a               | n/a               | -               | -              | -      | -         | 1                       | 50.5          | 62.2           | 87.5             |
| 5  | Control | 42.8 | M      | n/a               | n/a               | -               | -              | -      | -         | 4                       | 13.4          | 13.6           | 87.5             |
| 7  | Control | 52.8 | M      | n/a               | n/a               | -               | -              | -      | -         | 0                       | 43.7          | 40.8           | 87.5             |
| 10 | Control | 41.1 | M      | n/a               | n/a               | -               | -              | -      | -         | 0                       | 4.72          | 3.87           | 100              |
| 11 | Control | 56.6 | M      | n/a               | n/a               | -               | -              | -      | -         | 0                       | 5.03          | 4.83           | 73.3             |
| 16 | Control | 42.3 | M      | n/a               | n/a               | -               | -              | -      | -         | 0                       | 3.6           | 4.78           | 87.5             |
| 21 | Control | 34.1 | M      | n/a               | n/a               | -               | -              | -      | -         | 0                       | 3.84          | 4.72           | 64.7             |
| 22 | Control | 53.0 | M      | n/a               | n/a               | -               | -              | +      | -         | 0                       | 5.36          | 5.55           | 66.7             |
| 27 | Control | 48.7 | F      | n/a               | n/a               | -               | -              | -      | -         | 0                       | 7.92          | 7.39           | 100              |
| 30 | Control | 56.5 | M      | n/a               | n/a               | -               | -              | -      | -         | 0                       | 3.92          | 3.27           | 83.3             |
| 34 | Control | 46.9 | M      | n/a               | n/a               | -               | -              | -      | -         | 0                       | 5.58          | 5.73           | 100              |
| 35 | Control | 38.4 | M      | n/a               | n/a               | -               | -              | -      | -         | 0                       | 3.7           | 4.75           | 100              |
| 36 | Control | 47.8 | M      | n/a               | n/a               | -               | -              | -      | -         | 0                       | 5.6           | 5.53           | -100             |
| 37 | Control | 25.2 | F      | n/a               | n/a               | -               | -              | -      | -         | 0                       | 4.41          | 4.88           | 100              |
| 38 | Control | 19.9 | M      | n/a               | n/a               | -               | -              | +      | -         | 0                       | 5.4           | 5.14           | 12.5             |
| 39 | Control | 49.2 | M      | n/a               | n/a               | -               | -              | -      | -         | 0                       | 6.52          | 7.71           | 100              |



|           |                    |      |   |      |                            |   |   |   |   |    |       |       |      |
|-----------|--------------------|------|---|------|----------------------------|---|---|---|---|----|-------|-------|------|
| <b>40</b> | Control            | 69.4 | M | n/a  | n/a                        | - | - | - | - | 0  | 3.83  | 3.42  | 100  |
| <b>6</b>  | CRPS to left hand  | 42.4 | M | 1.2  | Wrist fracture             | + | + | + | + | 7  | 1.9   | 12.2  | 50   |
| <b>9</b>  | CRPS to left hand  | 42.8 | M | 0.9  | Wrist injury               | + | + | - | + | 8  | 10.6  | 12.3  | 83.3 |
| <b>12</b> | CRPS to left hand  | 55.6 | M | 0.5  | Frozen shoulder            | + | + | + | - | 9  | 2.06  | 4.13  | 83.3 |
| <b>14</b> | CRPS to left hand  | 45.3 | M | 3.8  | Hand surgery               | + | + | + | + | 7  | 1.8   | 2.55  | 4.3  |
| <b>23</b> | CRPS to left hand  | 66.7 | M | 0.4  | Hand injury and infection  | + | + | + | + | 2  | 0.88  | 4.31  | 73.9 |
| <b>26</b> | CRPS to left hand  | 47.8 | M | 4.1  | Hand surgery               | - | + | + | + | 0  | 2.9   | 3.89  | 100  |
| <b>28</b> | CRPS to left hand  | 41.9 | M | 14.9 | Hand trauma injury         | + | + | + | + | 7  | 0.33  | 3.55  | 100  |
| <b>29</b> | CRPS to left hand  | 29.2 | M | 1.8  | Hand injury                | + | + | + | + | 6  | 0.76  | 2.06  | -100 |
| <b>3</b>  | CRPS to right hand | 53.4 | M | 4.5  | Shoulder injury            | - | + | - | + | 9  | 49.2  | 15.5  | 100  |
| <b>8</b>  | CRPS to right hand | 38.1 | M | 0.4  | Hand and wrist injury      | + | + | + | + | 8  | 6.925 | 2.925 | 85.7 |
| <b>17</b> | CRPS to right hand | 51.6 | M | 0.4  | Hand injury                | + | + | + | + | 2  | 4.77  | 3.53  | 89.5 |
| <b>18</b> | CRPS to right hand | 34.7 | M | 2.9  | Hand fracture              | + | + | + | + | 7  | 3.82  | 1.3   | 73.3 |
| <b>19</b> | CRPS to right hand | 48.7 | F | 2.6  | Wrist fracture and surgery | + | + | + | + | 8  | 12.59 | 4.94  | 100  |
| <b>20</b> | CRPS to right hand | 46.7 | M | 7.5  | Shoulder injury            | - | + | + | + | 5  | 2.37  | 1.06  | 66.7 |
| <b>24</b> | CRPS to right hand | 56.8 | M | 14.6 | Arm injury                 | + | + | + | + | 10 | 3.07  | 0.9   | 100  |

|           |                    |      |   |      |                                           |   |   |   |   |   |      |      |       |
|-----------|--------------------|------|---|------|-------------------------------------------|---|---|---|---|---|------|------|-------|
| <b>25</b> | CRPS to right hand | 26.6 | M | 1.9  | Wrist fracture                            | + | + | + | + | 7 | 3.1  | 0.98 | -66.7 |
| <b>33</b> | CRPS to right hand | 21.4 | F | 2.6  | Wrist and Hand trauma injury with surgery | + | + | + | + | 0 | 4.79 | 3.84 | 100   |
| <b>41</b> | CRPS to right hand | 44.9 | M | 18.3 | Road traffic accident                     | + | + | + | + | 9 | 3.63 | 2.45 | 64.7  |

**Table 2.** *Statistical values for the comparison of the locations of map centroids between groups.*

| <b>Contrast</b>        | <b>Side</b>      | <b>F</b> | <b>Degrees of freedom</b> | <b>p</b> | <b>BF<sub>10</sub></b> |
|------------------------|------------------|----------|---------------------------|----------|------------------------|
| Controls vs Right CRPS | Left hemisphere  | 0.002    | 2,50                      | 0.998    | 0.001                  |
| Controls vs Right CRPS | Right hemisphere | 0.025    | 2,48                      | 0.975    | 0.306                  |
| Controls vs Left CRPS  | Left hemisphere  | 0.005    | 2,42                      | 0.995    | 0.309                  |
| Controls vs Left CRPS  | Right hemisphere | 0.001    | 2,44                      | 0.999    | 0.311                  |
